# Supplementary material for: Dimerization and Transactivation Domains as Candidates for Functional Modulation and Diversity of Sox9
Source: PubMed Central journal article supplement (PMC4873142; doi:10.1371/journal.pone.0156199), 2016-05-19
Supplement: pone.0156199.s003.pdf [file pone.0156199.s003.pdf]

**S2 Table. Ka/Ks calculation.** Values of Ka/Ks for the Sox9 domains, including the p-value and model of evolution.

| Tests                  | Sp1          | Sp2              | Ka/Ks      | P-Value(Fisher) | Result                     | Model |
|------------------------|--------------|------------------|------------|-----------------|----------------------------|-------|
| <b>Sox9 and Sox9a</b>  |              |                  |            |                 |                            |       |
| DIM                    | Danio rerio  | Homo sapiens     | 0.0113724  | <b>0</b>        | <b>purifying selection</b> | F81   |
| HMG                    | Danio rerio  | Homo sapiens     | 0.00180382 | <b>0</b>        | <b>purifying selection</b> | F81   |
| K2                     | Danio rerio  | Homo sapiens     | 0.0433189  | <b>1.41E-35</b> | <b>purifying selection</b> | HKY   |
| PQS                    | Danio rerio  | Homo sapiens     | 0.0213095  | <b>0</b>        | <b>purifying selection</b> | TN    |
| <b>Sox9 and Sox9b</b>  |              |                  |            |                 |                            |       |
| DIM                    | Homo sapiens | Monopterus albus | 0.016088   | <b>0</b>        | <b>purifying selection</b> | F81   |
| HMG                    | Homo sapiens | Monopterus albus | 0.00197404 | <b>0</b>        | <b>purifying selection</b> | F81   |
| K2                     | Homo sapiens | Monopterus albus | 0.0687748  | <b>0</b>        | <b>purifying selection</b> | TVM   |
| PQS                    | Homo sapiens | Monopterus albus | 0.0161906  | <b>0</b>        | <b>purifying selection</b> | TN    |
| <b>Sox9a and Sox9b</b> |              |                  |            |                 |                            |       |
| DIM                    | Danio rerio  | Monopterus albus | 0.011934   | <b>6.48E-40</b> | <b>purifying selection</b> | F81   |
| HMG                    | Danio rerio  | Monopterus albus | 0.001      | <b>6.13E-27</b> | <b>purifying selection</b> | HKY   |
| K2                     | Danio rerio  | Monopterus albus | 0.0467966  | <b>0</b>        | <b>purifying selection</b> | TVM   |
| PQS                    | Danio rerio  | Monopterus albus | 0.0162497  | <b>0</b>        | <b>purifying selection</b> | TIM   |
