# Supplementary material for: Dimerization and Transactivation Domains as Candidates for Functional Modulation and Diversity of Sox9
Source: PubMed Central journal article supplement (PMC4873142; doi:10.1371/journal.pone.0156199), 2016-05-19
Supplement: pone.0156199.s005.pdf [file pone.0156199.s005.pdf]

**S4 Table. Maximum-likelihood reconstruction tree parameters.** Data type, substitution model, tree searching operations, starting tree method and branch support are indicated.

| <b>Data</b> | <b>Substitution model</b> | <b>Tree searching operations</b> | <b>Starting tree</b> | <b>Branch support</b> |
|-------------|---------------------------|----------------------------------|----------------------|-----------------------|
| HMG         | Dayhoff                   | Best of NNI                      | Neighbor-joining     | aLRT (SH-like)        |
| SOXE        | LG                        | Best of NNI and SPR              | Neighbor-joining     | aLRT (SH-like)        |
| SOX9        | HKY+G                     | Best of NNI and SPR              | Neighbor-joining     | aLRT (SH-like)        |

NNI: nearest neighbor interchange, SPR: subtree pruning and regrafting, aLRT: approximate likelihood ratio test
