# Supplementary material for: Dimerization and Transactivation Domains as Candidates for Functional Modulation and Diversity of Sox9
Source: PubMed Central journal article supplement (PMC4873142; doi:10.1371/journal.pone.0156199), 2016-05-19
Supplement: pone.0156199.s006.pdf [file pone.0156199.s006.pdf]

S1 Text. Sox9 multiple codon sequence alignment. Codon based alignment of all Sox9 sequences used for the phylogenetic inference.

1

|            |                                                                                 |
|------------|---------------------------------------------------------------------------------|
| HoSapSSDR3 | ATGAATCTCCTGGACCCCTTCATGAAGATGACCGACGAGCAGGAGAAG---GGCCTGTCCGGCGCCCCCAGCCCCACC  |
| MuMusSCG1  | ATGAATCTCCTGGACCCCTTCATGAAGATGACCGACGAGCAGGAGAAG---GGCCTGTCTGGCGCCCCCAGCCCCACC  |
| CaLupS1    | ATGAATCTCCTGGACCCCTTCATGAAGATGACCGACGAGCAGGAGAAG---GGCCTGTCCGGCGCCCCCAGCCCCACC  |
| GaGalSTF2  | ATGAATCTCCTAGACCCCTTTATGAAAATGACAGAAGAACAGGATAAAA---GGCCTCTCCGGCGCCCCCAGCCCCACC |
| CoJapSSDRY | ATGAATCTCCTAGACCCCTTCATGAAAATGACGGAAGAACAGGACAAA---TGCATCTCCGACGCCCCCAGCCCCACC  |
| AlMisS1    | ATGAATCTCCTAGACCCCTTCATGAAAATGACAGAAGAGCAGGAGAAA---TGCATCTCTGGCGCCCCCAGCCCCACT  |
| TrScrHCC   | ATGAATCTCCTTGGACCCCTTCATGAAAATGACAGAAGAGCAGGACAAA---TGCATCTCTGGCGCCCCTAGCCCCACC |
| LeOliS     | ATGAATCTCCTTGGACCCCTTCATGAAAATGACAGAAGAGCAGGACAAA---TGCATCTCTGGCGCCCCTAGCCCCACC |
| AnPlaSSDRY | ATGAATCTCCTAGACCCCTTCATGAAAATGACAGAAGAACAGGACAAA---TGTATCTCCGACGCCCCCAGCCCCACC  |
| LaChaTFS9  | ATGAATCTACTCGATCCCTACATGAAAATGACAGAAGAGCAGGAGAAG---TGTATTTCTGATGCTCCAGCCCCACT   |
| XeLaeTFS1  | ATGAATCTCTTGGATCCCTTCATGAAGATGACAGAAGAGCAAGATAAG---TGCATGTCCGGGGCTCCAGCCCCAAC   |
| BuBufTFSP  | ATGAATCTCTTGGATCCCTTCATGAAGATGACAGAAGAGCAAGATAAG---TGCATGTCCGGGGCTCCAGCCCCAAC   |
| XeSilTFS9  | ATGAATCTCTTGGATCCCTTCATGAAGATGACAGAAGAGCAAGATAAG---TGCATGTCCGGGGCTCCAGCCCCAAC   |
| BuGarS     | ATGAATCTCTTGGATCCCTTCATGAAGATGACAGAAGAGCAAGATAAG---TGCCTGTCTGGGGCCCCAAGCCCTTCC  |
| RhMarS     | ATGAATCTCTTGGATCCCTTCATGAAGATGACAGAAGAGCAAGATAAG---TGCCTGTCTGGGGCCCCTAGCCCTTCC  |
| GlRugSAA   | ATGAATCTATTGGATCCTTTCTTAAAGATGACAGAAGAGCAAGATAAG---TGCCTATCTGGGGCACCAGCCCTAGC   |
| PlWals     | ATGAATCTCCTAGACCCCTTCATGAAAATGACCGAGGAGCAGGAGAAG---TGCCTGTCTGGAGCCCCCAGCCCTCC   |
| ScCanS1    | ATGAATCTCCTCAACCCCTTCGTCAAAATGACAGAGGGACACGAGAAG---ACGCTCTCCGACGTGCCAGCCCGAGC   |
| DaRerHBTFS | ATGAATCTCCTCGACCCCTACCTGAAGATGACGGATGAGCAAGAGAAG---TGTCTGTCTGATGCACCCAGTCCGAGC  |
| MoAlbHBTf1 | ATGAATCTCCTCGACCCCTTACCTGATGATGACGGAGGAACAAGACAAG---TGTCTCTCTGATGCCCGAGCCCGAGC  |
| OrNilTFS9a | ATGAATCTCCTCGACCCCTACCTGAAGATGACGGAGGAACAAGACAAG---TGTCTCTCTGACGCCCCGAGCCCGAGC  |
| GaAcuTFS9a | ATGAATCTCCTCGACCCCTTACCTGAAGATGACGGAGGAACAAGACAAG---TGTCTCTCCGACGCCCCGAGCCCGAGC |
| XiMacTFS9a | ATGAATCTCTCTCGATCCCTACCTGAAGATGACGGAGGAACAAGACAAG---TGTCTCTCTGACGCCCCGAGCCCGAGC |
| TaRubTFS9b | ATGAATCTCCTCGATCCTTACCTGAAGATGACGGAGGAACAAGATAAG---GGTCTCTCTGACGCCCCGAGCCCGAGC  |
| TeNigTFS9a | ATGAATCTCCTCGATCCTTATCTGAAGATGACGGAGGAACAAGATAAG---GGTATGTCTGACGCCCCGAGTCCGAGC  |
| OrLatSCC1  | ATGAATCTCCTCGACCCCTTACCTGAAGATGACGGAGGAACAAGACAAG---TGTCTCTCTGACGCCCCGAGCCCGAGC |
| AsMexTFS9a | ATGAATCTCCTGGACCCCTTCTTGAAGATGACGGACGAGCAAGACAAG---GGTCTGTCCGCCGCGCCGAGCCCCAGC  |
| GaMorS1    | ATGAATCTCCTCGACCCCTTCTTGAAGATGACGGAGGAACAAGAAAAG---TGTCTTTCGGACGTCCCGAGTCCGAGC  |
| MoAlbHBTFS | ATGAATCTCCTCGACCCCTTACCTGAAGATGACAGAAGAACAGGAGAAG---TGTCACTCTGACGCTCCAGTCCAGT   |
| OdBonTFS   | ATGAATCTCCTCGATCCTTACCTGAAGATGACAGAAGAACAGGAGAAG---TGTCACTCCGACGCTCCAGCCCCAGC   |
| PoRetS     | ATGAATCTCCTCGACCCCTTACCTGAAGATGACCGAAGAACAGGAGAAA---TGTCACTCCGACGCTCCAGCCCCAGC  |
| XiMacTFS9b | ATGAATCTCCTCGACCCCTTACCTGAAGATGACAGAAGAACAGGAGAAA---TGTCACTCCGACGCTCCAGCCCCAGC  |
| EpCois2    | ATGAATCTACTCGACCCCTTACCTGAAGATGACAGAAGAACAGGAGAAG---TGTCACTCTGACGCTCCGAGTCCAGC  |
| TaRubTFS9a | ATGAATCTCCTCGACCCCTTACCTGAAGATGACAGAAGAACAGGAGAAG---TGTCACTCCGACGCTCCAGCCCCAGC  |
| TeNigTFS9b | ATGAATCTCTCTGACCCCTACCTGAAAATGACAGAAGAACAGGAGAAG---TGTCACTCCGACGCTCCAGCCCCAGC   |
| OrNilTFS9b | ATGAATCTCCTCGACCCCTTACCTGAAGATGACAGAAGAACAGGAGAAG---TGTCACTCTGACGCTCCAGCCCCAAGC |
| CiMonTFS9  | ATGAATCTCCTCGATCCTTACCTGAAGATGACAGAAGAACAGGAGAAG---TGTCACTCTGACGCTCCAGCCCCAAGT  |
| CySemSHB   | ATGAATCTCCTCGACCCGTACCTGAAGATGACAGATGAACAGGAGAAG---TGTCACTCTGACGCTCCGAGCCCCTGC  |
| OrLatSCC   | ATGAATCTCCTCGATCCATACCTGAAGATGACAGAAGAACAGGAGAAG---TGTCACTCCGACGCTCCAGTCCAGC    |
| GaAcuTFS9b | ATGAATCTCCTCGACCCCTTACCTGAAGATGACAGAAGAACAGGAGAAG---TGTCACTCTGACGCTCCAGTCCAGC   |
| SaSalTFS2  | ATGAATCTACTCGACCCCTTCTTGAAGATGACAGACGAACAGGAGAAG---TGTCTCTCTGACGCTCCAAGCCCCAGC  |
| GaMorS2    | ATGAATCTACTCGACCCCTTACCTTAAAATGACAGAAGAACAGGAGAAGTGTGTCACTCTGACGCTGCCAAGCCCCAGC |
| AsMexTFS9b | ATGAATCTCCTCGACCCCTACCTGAAGATGACCGACGACCGGGACAAG---TGTCTCCGCGACGCCCCGAGCCCCGGT  |
| ClGarS     | ATGAATCTCCTCGAGCCTTACCTGAAGATGACCGACGAGCAGGACAAA---TGTCTCTCCGACGCGCCGAGTCCGAGC  |
| CyCarHTF13 | ATGAATCTCTTGCATCCTACCTGAAAATGAGCGACGAGCAGGACAAG---GGTCTCTCCGACGCGCCAGCCCCAGC    |
| ClGarS1    | ATGAATCTCCTCGACCCCTTCTTGAAGATGACGGACGAGCAAGACAAG---AGTCTGTCCGACGCCCCGAGTCCGAGC  |
| DaRerHBTf1 | ATGAATCTCCTCCAGCGCGGGCTGAAGATG-----AGTGTGTCCGAGCTCCAGCCCCAGT                    |

79

|            |                                                                         |
|------------|-------------------------------------------------------------------------|
| HoSapSSDR3 | ATGTCC---GAGGACTCC---GCGGGCTCGCCC---TGCCCGTCG---GGCTCCGGC-----TCGGACACC |
| MuMusSCG1  | ATGTCC---GAGGACTCG---GCTGGTTCGCCC---TGTCCCTCG---GGCTCCGGC-----TCGGACACG |
| CaLupS1    | ATGTCC---GAGGACTCG---GCGGGCTCGCCC---TGCCCTTCG---GGCTCCGGC-----TCGGACACC |
| GaGalSTF2  | ATGTCC---GATGACTCC---GCGGGGTCCCC---TGCCCTTCC---GGATCCGGC-----TCGGACACG  |
| CoJapSSDRY | ATGTCC---GATGACTCC---GCCGGGTCTCCT---TGTCCCTCC---GGATCCGGC-----TCGGACACG |
| AlMisS1    | ATGTCC---GATGACTCT---GCAGGCTCTCCC---TGCCCTTCT---GGCTCCGGA-----TCGGACACG |
| TrScrHCC   | ATGTCC---GACGACTCC---GCGGGGTCCCC---TGCCCTTCT---GGTTCGGGA-----TCGGACACG  |
| LeOliS     | ATGTCC---GACGACTCC---GCGGGGTCCCC---TGCCCTTCT---GGTTCGGC-----TCGGACACT   |
| AnPlaSSDRY | ATGTCC---GATGACTCC---GCCGGGTCCCC---TGCCCTTCT---GGATCCGGC-----TCGGACACG  |
| LaChaTFS9  | ATGTCC---GAGGACTCT---GCGGGGTCCCC---TGTCACTCG---GGCTCAGGA-----TCAGACACT  |
| XeLaeTFS1  | ATGTCC---GACGACTCG---GCAGGTTCCCCA---TGTCCCTCT---GGCTCCGGC-----TCCGACACG |
| BuBufTFSP  | ATGTCC---GAGGACTCG---GCTGGCTCCCCA---TGCCCTTCC---GGCTCTGGC-----TCCGACACG |
| XeSilTFS9  | ATGTCC---GAGGACTCG---GCTGGCTCCCCA---TGCCCTTCC---GGCTCTGGC-----TCCGACACG |
| BuGarS     | ATGTCT---GAGGACTCT---GCTGGCTCCCTT---TGCCCTTCT---GGCTCAGGC-----TCAGATACT |
| RhMarS     | ATGTCT---GAGGACTCT---GCTGGCTCCCTT---TGCCCTTCT---GGCTCAGGC-----TCAGATACT |
| GlRugSAA   | ATGTCT---GAGGACTCA---GCTGGCTCCCC---TGCCCTTCT---GGTCTGGA-----TCAGACACA   |

PlWals ATGTCC---GAGGACTCG---GTGGGCTCGCCC---TGCCCCTCG---GGCTCCAGC-----TCGGACGCC  
 ScCanS1 ATGTCCGAGGAGGAATCT---TCCGATTCCCC---TGCGGTTC---GGGGCTGGC-----TCCGACGCC  
 DaRerHBTFS ATGTCC---GAGGACTCC---GCGGGCTCGCCC---TGCCCCTCC---GCCTCGGGC-----TCAGACACT  
 MoAlbHBTFS1 ATATCC---GAAGACTCC---GCGGGCTCCCC---TGCCCATCT---GGTCCGGC-----TCCGACACG  
 OrNilTFS9a ATGTCT---GAGGACTCT---GCGGGCTCCCC---TGCCCCTCC---GGCTCGGGC-----TCCGACACC  
 GaAcuTFS9a ATGTCC---GAGGACTCC---GCGGGATCTCCG---TGCCCCTCC---GGCTCGGGC-----TCCGACACA  
 XiMacTFS9a ATGTCC---GAGGACTCG---GCGGGTCCCC---TGCCCCTCC---GGCTCGGGG-----TCCGACGCC  
 TaRubTFS9b ATGTCT---GATGACTCC---GCGGGCTCTCCG---TGCCCCTCC---GGTTCGGGG-----TCAGACACG  
 TeNigTFS9a ATGTCC---GAGGACTCC---CCGGGCTCTCCG---TGTACGTCT---GGCTCAGGG-----TCAGACACA  
 OrLatSCC1 ATGTCC---GAGGACTCC---GCGGGATCCCCGCCAGCCCCTCC---GGTCCGGC-----TCCGACACC  
 AsMexTFS9a TTGTCC---GAGGACTCC---GCGGGCTCCCC---TGCCCCTCC---GCCTCCGGA-----TCCGACCCG  
 GaMorS1 ATGTCA---GAGGATTCT---ACGGGCTCGCCG---TGCCCCTCC---AGCTCGAGC-----TCCGACACC  
 MoAlbHBTFS ATGTCT---GAGGACTCC---GCAGGCTCGCCG---TGCCCCTCC---GGGTCCGGT-----TCGGATAAC  
 OdBonTFS ATGTCT---GAAGACTCC---GCGGGCTCGCCG---TGCCCCTCC---GGTCCGGT-----TCGGACACT  
 PoRetS ATGTCT---GAAGACTCA---GCTGGCTCGCCG---TGCCCCTCC---GGTCCGGT-----TCGGACACC  
 XiMacTFS9b ATGTCT---GAAGACTCA---GCGGGCTCGCCG---TGCCCCTCC---GGTCCGGT-----TCGGACACC  
 EpCois2 ATGTCT---GAGGACTCC---GCAGGCTCGCCG---TGCCCCTCC---GGGTCCGGT-----TCGGACACT  
 TaRubTFS9a ATGTCC---GAGGACTCC---GCGGGCTCTCCG---TGCCCCTCC---GGTCCGGC-----TCGGACACT  
 TeNigTFS9b ATGTCC---GAGGACTCC---GCGGGCTCTCCG---TGCCCCTCC---GGTCCGGC-----TCGGACACT  
 OrNilTFS9b ATGTCT---GAGGACTCC---GCGGGCTCGCC---TGTCCGTCC---GGGTCCGGT-----TCGGACACT  
 CiMonTFS9 ATGTCT---GAGGACTCC---GCGGGCTCGCC---TGTCCGTCC---GGTCCGGT-----TCGGACACT  
 CySemSHB ATGTCT---GACGACTCT---GCCGGCTCGCCC---TGTCCATCA---GGTCCGGT-----TCGGACACC  
 OrLatSCC ATGTCT---GAGGACTCC---GCAGGTTCCGCT---TGTCCGTCC---GGTCCGGT-----TCGGACACC  
 GaAcuTFS9b ATGTCC---GAGGACTCC---GCAGGCTCACCG---TGC---TCC---GTGTCCGGT-----TCGGACACT  
 SaSalTFS2 ATGTCT---GACGATTCC---GTCGGCTCGCCG---TGCCCCTCC---GGTCCGGT-----TCGGACACC  
 GaMorS2 ATGTCTGAAGAAGACTCC---GTTGGCTCTCCT---TGCCCCTCC---GGTCTGGG-----TCAGACACC  
 AsMexTFS9b ATGGATTCCGAGGACTCCGGCGCCGCTCCCC---TGCCCCTCC---GGTCCGGC-----TCGGACACG  
 ClGarS ATGTCC---GAAGACTCG---GCAGCCTCCCC---TGTCCGTCT---GGTTCGGC-----TCCGACACC  
 CyCarHTF13 ATGTCC---GAGGATTCC---GCCGGTCTCCG---TGTCCGTCC---GGATCGGGC-----TCGGACACC  
 ClGarS1 ATGTCC---GAGGATTCC---GCGGGTCTCCG---TGTCCCTCC---GCCTCCGGTTCTGGCTCGTGC---TCGGACGTTG  
 DaRerHBTFS1 CTTTCC---GAGGACTCC---GCCGGCTCTCCG---TGCGCCTCCGCCGGCTCGGGA-----TCGGACAGC

157

HoSapSSDR3 GAGAAC-----ACGCGG---CCCCAGGAGAACACGTTCCCCAAGGGCGAG---CCC-----GATCTGAAG  
 MuMusSCG1 GAGAAC-----ACCCGG---CCCCAGGAGAACACCTTCCCCAAGGGCGAG---CCG-----GATCTGAAG  
 CaLupS1 GAGAAC-----ACGCGG---CCCCAGGAGAACACGTTCCCCAAGGGCGAG---CCG-----GACCTGAAG  
 GaGalSTF2 GAGAAC-----ACCCGTCCTCCTCAAGAGAAACACCTTCCCCAAGGGCGAC---CCG-----GACCTGAAG  
 CoJapSSDRY GAGAAC-----ACCCGA---CCTCAAGAAAACACCTTCCCCAAGGGCGAC---CCG-----GACCTGAAG  
 AlMisS1 GAGAAC-----ACCCGG---CCCCAAGAAAACACCTTCCCCAAGGGGGAC---CCG-----GACCTCAAG  
 TrScrHCC GAGAAC-----ACCAGA---CCGCAAGAAAACACTTTCCCCAAGGGCGAT---CCG-----GATCTGAAG  
 LeOliS GAGAAC-----ACCAGA---CCGCAAGAAAACACTTTCCCCAAGGGCGAT---CCG-----GATCTGAAG  
 AnPlaSSDRY GAGAAC-----ACCAGA---CCCCAAGAAAACACCTTCCCCAAGGGCGAC---CCG-----GACCTGAAG  
 LaChaTFS9 GAGAAC-----ACCAGA---CCTCAGGAGAACACCTACTCCAATGGGGAC---TTG-----GAGATGAAG  
 XeLaeTFS1 GAGAAC-----ACCAGA---CCCCAAGAAAACACTTTCCCCAAGGGGGAC---CAG-----GAGCTGAAG  
 BuBufTFSP GAGAAC-----ACCAGA---CCCCAAGAGAACACTTTCCCCAAGGGGGAC---CCG-----GAGCTGAAG  
 XeSilTFS9 GAGAAC-----ACCAGA---CCCCAAGAGAACACTTTCCCCAAGGGGGAC---CCG-----GAGCTGAAG  
 BuGarS GAGAAC-----ACCAGA---CCTCAAGAGAACACTTTCCCCAAGGGGGAT---CCT-----GACATGAAG  
 RhMarS GAGAAC-----ACCAGA---CCTCAAGAGAACACTTTCCCCAAGGGGGAT---CCT-----GACATGAAG  
 GlRugSAA GAGAAC-----ACCAGA---CCCCAAGAGAACACTTACCAAGGGGGAC---CAG-----GACCTGAAG  
 PlWals GAGAAC-----ACCCGG---CCCATGGAGAACGGCTTCCCCAAGGGCGAGTGCAG-----GAGCTGAAG  
 ScCanS1 GAGAAC-----ACGAAA---CCCGGCGAGAACCGG---CAGGGCGAC---CCGTGCGCCCAGAGCCTGGAT  
 DaRerHBTFS GAGAAC-----ACGCGC---CCGGCGGAGAACAGCCTCCTGGCTGCAGACGGGACG---CTCGGAGACTTCAAG  
 MoAlbHBTFS1 GAGAAC-----ACCCGG---CCGTCCGAGAACGGGCTGCTCAGAACGGACGGAACC---CTAAGCGACTTCAAG  
 OrNilTFS9a GAGAAC-----ACCCGG---CCGTCCGAGAACGGGCTGCTCAGAGCGGACGGATCT---CTGGGCGACTTCAAA  
 GaAcuTFS9a GAGAAC-----ACCCGG---CCATCTGAGAACGGGCTACTCGGTCTAGAT-----GGAGAGTTTAAG  
 XiMacTFS9a GAGAAC-----ACGCGG---CCGTCCGAGAACCGCTGCGGCGCGGACGCGGCGCTGCTGGGCGACTTCAAG  
 TaRubTFS9b GAGAAC-----ACCCGG---CCGTCCGAGAACGGGCTGATGCGGGCGGAC-----GGAGACCTAAAG  
 TeNigTFS9a GAGAAC-----ACCCGG---CCGTCCGAGAACGGGCTGCTGCGGGCGGAC-----GGAGACCTAAAG  
 OrLatSCC1 GAGAAC-----ACCCGG---CCGCGGGAAAACGGCCTGATGCGCGCGGACGGAGCT---CTGAGCGACTTCAAG  
 AsMexTFS9a GACCGC---GCCGCC---GCCGAGAGCCGC-----CTGACGACTTCAAG  
 GaMorS1 GAGAAC-----ACGAGA---CCCTCAGGAGAACGGCTTCTGCGCGGACGGGGTCAACATCGGCGACTTCAAG  
 MoAlbHBTFS GAGAAC-----ACCCGA---CCGTCCGAGAACCACCTCCTCAGGGGTCCGGAC-----TACAAG  
 OdBonTFS GAAAAT-----ACCCGA---CCGTCTGACAACCACCTCCTTGGAGGTCCAGAC-----TACAAG  
 PoRetS GAGAAC-----ACCCGG---CCGTCCGACAACCACCTCCTCAGGGGTCCGGAC-----TACAAG  
 XiMacTFS9b GAGAAC-----ACCCGG---CCGTCCGACAACCACCTCCTCAGGGGACCGGAC-----TACAAG  
 EpCois2 GAGAAC-----ACCCGG---CCGTCCGACAACCACCTTCTCTAGGTCAAGAC-----TACAAG  
 TaRubTFS9a GAGAAC-----ACCAGA---CCGTCCGACAACCACCTCCTTCTGGGTCCAGAC-----TACAAG  
 TeNigTFS9b GAGAAC-----ACCAGG---CCGTCCGACAACCACCTCCTTCTGGGTCCAGAC-----TACAAG

OrNilTFS9b GAAAAC-----ACTCGT---CCGTCCGACAACCACCTCCTCATGGGTCAAGAC-----TATAAG  
 CiMonTFS9 GAAAAC-----ACTCGT---CCGTCCGACAACCACCTCCTCATGGGTCCAGAC-----TATAAG  
 CySemSHB GAGAAC-----ACCCGT---CCCACCGACAACCACCTCCTCGGGGGTCTGAC-----TACAAG  
 OrLatSCC GAAAAC-----ACCCGG---CCGTCCGACAACCATCTCATCAGGGGGCCGGAC-----TACAAG  
 GaAcuTFS9b GAGAAC-----ACCCGG---CCGTCCGACAACCACCTCCTCCTGGGTGCAGAC-----TACAAG  
 SaSalTFS2 GAGAAT-----ACCAGG---CCGTCCGATAATCATCTCTTACTGGGTCCAGATGGCGTGCTCGGCGAATTCAAG  
 GaMorS2 GAGAAC-----CACCGG---CCGTCCGACAACCACCTCCTCTTAGGACAGGACCATCCTATGGGTGAATACAAG  
 AsMexTFS9b GAAAAC-----ACGCGG---CCAACCGACATCCAC-----GACGAT-----TTTAAG  
 ClGarS GAGAAC-----ACGCGGCCGCCGTCCGAGAATCGG-----TTCAAG  
 CyCarHTF13 GAGAAC-----ACCCGC---CCGGAGGAGCAC-----CTGGGAGAGTTTAAG  
 ClGarS1 GAGACCGGCGGTGGCGTGCGC---GCGCGGACGTCGGC-----GGCGAGCTGAAA  
 DaRerHBTf1 GAGACC-----CCCCGCGCGGAGCCGCCGCTG-----

235

HoSapSSDR3 AAG-----GAGAGCGAGGAGGAC---AAGTTCCCCGTGTGCATCCGCGAGGCGGTGAGCCAGGTGCTC  
 MuMusSCG1 AAG-----GAGAGCGAGGAAGAT---AAGTTCCCCGTGTGCATCCGCGAGGCGGTGAGCCAGGTGCTG  
 CaLupS1 AAG-----GAGAGCGAGGAGGAC---AAGTTCCCCGTGTGCATCCGCGAGGCGGTGAGCCAGGTGCTC  
 GaGalSTF2 AAG-----GAAAGCGACGAGGAC---AAATTCCCCGTGTGCATCCGCGAGGCGGTGAGCCAGGTGCTC  
 CoJapSSDRY AAG-----GAGAACGACGAGGAC---AAATTCCCCGTGTGCATCCGCGAAGCTGTGAGCCAGGTGCTC  
 AlMisS1 AAA-----GACAGCGACGAGGAC---AAGTTCCCCGTGTGCATCCGGGAGGCTGTCAGCCAGGTCTC  
 TrScrHCC AAA-----GAGAGCGACGAGGAC---AAATTCCCGGTGTGCATCCGAGAGGCGGTGAGCCAGGTCTC  
 LeOliS AAA-----GAGAGCGACGAGGAC---AAATTCCCGGTGTGCATCCGAGAGGCGGTGAGCCAGGTCTC  
 AnPlaSSDRY AAG-----GAGAGCGACGAGGAC---AAGTTCCCGGTGTGCATCCGAGAGGCGGTGAGCCAGGTGCTC  
 LaChaTFS9 AAA-----GAGACAGACGAAGAC---AAATTCCCAGTCTGCATCCGCGAAGCTGTGAGCCAGGTCTC  
 XeLaeTFS1 AAG-----GAGACGGAGGATGAG---AAGTTCCCCGTGTGCATCAGAGAAGCGGTGAGCCAGGTGTTG  
 BuBufTFS9 AAG-----GAGACAGAGGACGAA---AAGTTTCTGTGTGCATCAGAGAGGCGGTGAGCCAGGTGCTG  
 XeSilTFS9 AAG-----GAGACAGAGGACGAA---AAGTTTCTGTGTGCATCAGAGAGGCGGTGAGCCAGGTGCTG  
 BuGarS AAG-----GAAAACAGAGGATGAA---AAGTTCCCTGTCTGCATCAGAGAGGCGGTGAGCCAGGTGCTG  
 RhMarS AAG-----GAAAACAGAGGATGAA---AAGTTCCCTGTCTGCATCAGAGAGGCGGTGAGCCAGGTGCTG  
 GlRugSAA AAG-----GAGACAGAGGATGAG---AAGTTCCCTGTCTGCATCAGAGAGGCGGTGAGCCAGGTGCTG  
 PlWals AAG-----GAGAACGAGGAAGAC---AAGTTCCCCGTGTGCATCCGCGAGGCGGTGAGCCAGGTGCTG  
 ScCanS1 TCC-----AAAAAGGACGACGAC---AAGTTCCCGCGGTGTATCCGCGAGGCGGTGAGCCAGGTGCTG  
 DaRerHBTFS AAG-----GACGAA---GAGGAC---AAGTTCCCGGTGTGCATCCGAGAGGCGGTGTCCAGGTGCTG  
 MoAlbHBTf1 AAG-----GACGAG---GACGAT---AAGTTTCCCGCATGTATCCGCGAAGCTGTGTCCAGGTGCTC  
 OrNilTFS9a AAG-----GACGAG---GAAGAC---AAGTTTCCCGCTTGCATCCGCGAAGCCGTGTCCAGGTGCTC  
 GaAcuTFS9a AAG-----GATGAG---GACGAT---AAATTTCCCGCTTGCATCCGCGAGGCGGTGTCCAGGTGCTC  
 XiMacTFS9a AAG-----GACGAG---GACGAT---AAGTTCCCGCGTGCATCCGCGAGGCGGTGTCCAGGTGCTG  
 TaRubTFS9b AAG-----GATGAG---GAAGAC---AAGTTTCCAGCGTGCATTCGCGATGCCGTGTCCAGGTCTC  
 TeNigTFS9a AAA-----GACGAG---GAGGAC---AAGTTCCAGCGTGCATCCGCGACGCGGTGTCCAGGTCTC  
 OrLatSCC1 AAG-----GACGAA---GACGAC---AAGTTTCCCGCGTGCATCCGGGAGGCGGTGTCTCAGGTGCTG  
 AsMexTFS9a AAG-----GACGAGGTGGACGAC---AAGTTCCCGGTGTGCATCCGCGAGGCGGTGAGCCAGGTGCTC  
 GaMorS1 AAG-----GACGAG---GAGGAT---AAGTTTCCCGTGTGCATCCGCGAGGCGGTGTCCAGGTGCTC  
 MoAlbHBTFS AAG-----GAGGGCGAAGAAGAA---AAGTTCCCGGTGTGTATCAGAGATGCAGTGTCCAGGTATTG  
 OdBonTFS AAG-----GAGGGCGAAGAAGAA---AAGTTCCCGGTGTGTATCAGGGATGCGGTGTCCAGGTGTTA  
 PoRetS AAG-----GAGGGCGAGGAAGAG---AAGTTCCCGGTGTGCATCAGAGACGCGGTGTCCAGGTGCTG  
 XiMacTFS9b AAG-----GAGGGCGAGGAAGAG---AAGTTCCCGGTGTGCATAAGAGATGCGGTGTCCAGGTGCTG  
 EpCois2 AAG-----GAGGGCGAAGAAGAG---AAGTTCCCGGTGTGTATCAGAGATGCGGTGTCCAGGTGTTG  
 TaRubTFS9a AAG-----GAGAACGAAGAAGAG---AAGTTCCCGGTGTGCATCAGGGATGCGGTGTCCAGGTGCTG  
 TeNigTFS9b AAG-----GAAAACGAAGAAGAG---AAGTTCCCGGTGTGTATCAGAGATGCGGTGTCCAGGTGCTG  
 OrNilTFS9b AAG-----GAAACCGAAGAGGAA---AAGTTCCCGGTGTGTATCAGAGACGCGGTGTCTCAGGTGTTG  
 CiMonTFS9 AAG-----GAAAAGCGAAGAGGAG---AAGTTCCCGGTGTGTATCAGAGATGCGGTGTCTCAGGTGTTG  
 CySemSHB AAA-----GAGGGCGAAGAGGAG---AAGTTTCTGTCTGCATCAGAGATGCAGTGTCCAGGTGCTG  
 OrLatSCC AAA-----GAGGGTGAAGAAGAG---AGGTTCCCGGTGTGCATTAGAGACGCGGTGTCCAGGTGCTC  
 GaAcuTFS9b AAA-----GAGGGCGAAGAAGAA---AAGTTCCCGGTGTGCATCAGAGATGCGGTGTCCAGGTGTTG  
 SaSalTFS2 AAG-----GCTGACCAAGAC---AAGTTCCAGTATGTATCAGAGATGCGGTGTCTCAGGTGCTG  
 GaMorS2 AAG-----GAGGCGGAGGAAGAG---AAGTTCCCGGTGTGCATTAGAGATGCCGTGTCCAGGTGCTG  
 AsMexTFS9b AAG-----GAC---GATGAGGAA---AAGTTCCCGTCTGCATCCGGGACGCAAGTGTCCAGGTGCTG  
 ClGarS AAA-----GACGAAGAGGATGAAAACAAGTTTCCCGTCTGCATCCGCGACGCGGTGTCCAGGTGCTC  
 CyCarHTF13 AAG-----GACGAGGAC---AAGTTCCCGGTGTGTATCAGGGACGCGGTGTCTCAGGTGCTG  
 ClGarS1 AAGTTGGACGGGGAGGACGAGCACGAGAACAACGAGAAGTTCCCGCAGTGCATCCGCGAGGCTGTGTCCAGGTGCTC  
 DaRerHBTf1 -----CACCGGGACGAGCAGGAGAAGTTCCCGGTGTGTATCCGGGACGCGGTGTCCAGGTGCTG

313

HoSapSSDR3 AAAGGCTACGACTGGACGCTGGTGCCCATGCCCGTGCAGCGTCAACGGCTCCAGCAAGAACAAGCCGCACGTCAAGCGG  
 MuMusSCG1 AAGGGCTACGACTGGACGCTGGTGCCCATGCCCGTGCAGCGTCAACGGCTCCAGCAAGAACAAGCCACACGTCAAGCGA  
 CaLupS1 AAGGGCTACGACTGGACGCTGGTGCCCATGCCCGTGCAGCGTCAACGGCTCCAGCAAGAACAAGCCGCACGTCAAGCGG  
 GaGalSTF2 AAGGGCTACGACTGGACCTGGTGCCCATGCCCGTGCAGGGTGAACGGATCCAGCAAGAACAACCCACGTGAAGCGC  
 CoJapSSDRY AAGGGCTACGATTGGACCTGGTGCCCATGCCCGTGCAGGGTGAATGGATCCAGCAAGAACAACCCACGTGAAGCGT

AlMiss1 AAGGGCTACGACTGGACCCTGGTCCCCATGCCGGTCCGGGTGAATGGATCCAGTAAGAACAAGCCGCACGTGAAGAGA  
TrScrHCC AAGGGTTACGACTGGACCCTGGTCCCCATGCCGGTCCGGTGTGAACGGATCCAGCAAAAAACAAGCCCCACGTGAAGAGA  
LeOliS AAGGGTTACGACTGGACCCTGGTCCCCATGCCGGTCCGGTGTGAACGGATCCAGCAAAAAACAAGCCCCACGTGAAGAGA  
AnPlaSSDRY AAGGGCTACGACTGGACCCTGGTGCCCATGCCGGTCCGGGTGAACGGATCCAGCAAAAAACAAGCCCCACGTGAAGAGA  
LaChaTFS9 AAGGGATATGACTGGACCCTGGTGCCTATGCCAGTCAGGGTGAATGGATCCAGCAAAAAATAAGCCTCATGTCAAGAGA  
XeLaeTFS1 AAGGGATATGATTGGACCCTGGTACCGATGCCAGTCAGAGTAAATGGATCCAGCAAGAACAAGCCCCATGTCAAGAGA  
BuBufTFSP AAGGGATATGACTGGACCCTGGTACCGATGCCAGTCAGAGTAAATGGATCCAGCAAGAGCAAGCCTCATGTCAAGAGA  
XeSilTFS9 AAGGGATATGACTGGACCCTGGTACCGATGCCAGTCAGAGTAAATGGATCCAGCAAGAGCAAGCCTCATGTCAAGAGA  
BuGarS AAGGGATATGACTGGACCCTGGTGCCCATGCCAGTCAGGGTGAATGGATCCAGCAAGAACAAGCCCCACGTCAAGAGG  
RhMarS AAGGGATATGACTGGACCCTGGTGCCCATGCCAGTCAGGGTGAATGGATCCAGCAAGAACAAGCCCCATGTCAAGAGG  
GlRugSAA AAGGGATATGACTGGACCCTGGTGCCCATGCCAGTCAGGGTCAATGGATCCAGCAAGAACAAGCCGCATGTCAAGAGG  
PlWals AAGGGCTACGACTGGACCCTGGTGCCCATGCCCGTGC GG GTGAACGGCTCCAGCAAGAACAAGCCGCACGTCAAGCGG  
ScCanS1 AAAGGATACGACTGGACCCTGGTGCCCATGCCGGTCCGGTCAATGGCTCGTCCAAGAACAAGCCTCACGTCAAAAAGA  
DaRerHBTFS AAGGGTTACGACTGGACGCTGGTGCCCATGCCGGTGAAGGGTGAACGGGTCCAGCAAAAAACAAGCCGCACGTCAAGAGA  
MoAlbHBTf1 AAGGGTTACGACTGGACCCTCGTGCCTATGCCGGTGC GCGT TAAACGGATCTACTAAGAACAAGCCTCACGTGAAGAGA  
OrNilTFS9a AAGGGTTACGACTGGACCCTCGTGCCTATGCCGGTGC GCGT TAAACGGATCTACTAAGAACAAGCCTCACGTGAAGAGA  
GaAcuTFS9a AAGGGCTACGACTGGACTCTTGTGCCTATGCCAGTCGCGGTTAAACGGGTCTCTAAGAACAAGCCTCACGTGAAAAGA  
XiMacTFS9a AAGGGCTACGACTGGACCCTCGTGCCTATGCCCGTGC GCGTGAACGGATCTACCAAGAACAAGCCGCACGTGAAGAGG  
TaRubTFS9b AAAGGCTACGACTGGACCCTCGTCCCTATGCCAGTCGCGTAAATGGATCTTCCA AAAACAAGCCTCACGTCAAGAGA  
TeNigTFS9a AAAGGCTACGACTGGACCCTCGTCCCATGCCAGTCGCGTAAATGGATCTTCCA AAAACAAGCCTCACGTCAAAAAGA  
OrLatSCC1 AAGGGCTACGACTGGACGCTCGTGCCTATGCCGGTGC GCGT TAAACGGATCTACAAAGAACAAGCCGCACGTGAAGAGA  
AsMexTFS9a AAGGGCTACGACTGGACGCTCGTGCCTATGCCGGTGC GCGTGAACGGCTCGAGCAAGAACAAGCCGCATGTCAAGAGG  
GaMorS1 AAGGGCTACGACTGGACCCTGGTGCCCATGCCCGTGC GCGT TAAACGGATCTAGTAAGAACAAGCCGCACGTGAAGAGA  
MoAlbHBTFS AAAGGCTACGACTGGACGTTGGTGCCCATGCCGGTGC GCGTCAACGGCTCAACTAAAAACAAGCCTCATGTCAAAAAGA  
OdBonTFS AAGGGTTACGACTGGACTCTTGTGCCCATGCCGGTGC GCGTCAACGGCTCAAGCAAAAACAAGCCTCACGTCAAAAAGA  
PoRetS AAGGGCTATGACTGGACGCTCGTACCCATGCCGGTGC GCGTCAACGGCTCCAGCAAGAGCAAGCCGCACGTAAAGAGA  
XiMacTFS9b AAGGGCTATGACTGGACTCTAGTACCCATGCCGGTGC GCGTCAACGGCTCCAGCAAGAGCAAAACACACGTAAAGAGA  
EpCoiS2 AAGGGCTACGACTGGACGCTGGTGCCCATGCCGGTGC GCGT TAAACGGCTCCAGTAAAAGCAAAACCTCACGTCAAAAAGA  
TaRubTFS9a AAGGGCTACGACTGGACGCTGGTGCCCATGCCCGTGC GCGTCAACGGCTCCAACA AAAATAAAACCTCACGTCAAGAGA  
TeNigTFS9b AAGGGTTACGACTGGACGCTGGTGCCCATGCCGGTGC GCGTCAACGGCTCCAACA AAAATAAAACCTCACGTGAAAAGA  
OrNilTFS9b AAGGGTTACGACTGGACGCTCGTGCCTATGCCGGTGC GCGTCAACGGCTCGAGTAAAAGCAAAACCCACGTCAAAAAGA  
CiMonTFS9 AAGGGTTACGACTGGACGCTCGTCCCTATGCCGGTGC GGTGTCAACGGCTCGAGTAAAAGTAAACCCACGTCAAAAAGA  
CySemSHB AAGGGATACGACTGGACTCTGGTGCCTATGCCAGTCGCGGTTAAACGGCTCGAGTAAAACAAGCCTCATGTGAAAAGA  
OrLatSCC AAGGGCTACGACTGGACTCTGGTGCCTATGCCAGTACGCGTCAACGGCTCGAGTAAAAGCAAAACCTCACGTCAAAAAGG  
GaAcuTFS9b AAGGGCTACGACTGGACTCTGGTGCCCATGCCGGTGC GCGTCAACGGCTCGAGTAAAAGCAAAACCTCACGTCAAGAGA  
SaSalTFS2 AAGGGTTACGACTGGACCTTGGTGCCCATGCCCGTCC GAGTGAACGGCTCCAGCAAAAAACAAGCCCCATGTCAAGAGA  
GaMorS2 AAGGGCTACGACTGGACCCTGGTGCCCATGCCGGTGC GCGT TAAACGGTTCCAGTAAAATAAAACCCACGTGAAGAGA  
AsMexTFS9b AAGGGCTACGACTGGACGCTCGTGCCTATGCCGGTGC GCGT TAAACGGCTCGAGCAAGAACAAGCCGCACGTGAAGAGA  
ClGarS AAAGGCTACGACTGGACGCTCGTGCCTATGCCGGTGC GCGT TAAACGGCTCGGGGAAGAGCAAGCCGCACGTGAAGAGG  
CyCarHTF13 AAGGGCTACGACTGGACCCTGGTGCCCATGCCTGTGC GAGTGAACGGCGCGCACAGAGCAAGCCGCACGTGAAGAGA  
ClGarS1 AAGGGCTACGACTGGACGCTCGTGCCTGTGCCGGTGC GCGTGCACGGCGCCAGCAAAAAACAAGCCGCACGTGAAGCGG  
DaRerHBTf1 AAGGGCTACGACTGGTCTCTGGTGCCCATGCCGGTGC GGGTGAAGAGCAAAACCCGCACGTCAAGAGA

391

HoSapSSDR3 CCCATGAACGCCTTCATGGTGTGGGCGCAGGCGGCGCAGGAAGCTCGCGGACCAGTACCCGCACCTTGACACAACGCC  
MuMusSCG1 CCCATGAACGCCTTCATGGTGTGGGCGCAGGCTGCGCGCAGGAAGCTGGCAGACCAGTACCCGCATCTGCACAACGCC  
CaLupS1 CCCATGAACGCCTTCATGGTGTGGGCGCAGGCGGCGCAGGAAGCTCGCGGACCAGTACCCGCACCTTGACACAACGCC  
GaGalSTF2 CCCATGAACGCCTTCATGGTGTGGGCCAGGCGGCTCGAAGGAAGCTGGCTGACCAGTACCCGCATCTGCACAACGCC  
CoJapSSDRY CCCATGAACGCCTTTATGGTGTGGGCCAGGCGGCTCGAAGGAAGCTGGCTGACCAATACCCGCATCTGCACAACGCC  
AlMiss1 CCCATGAATGCCTTCATGGTGTGGGCTCAGGCGCCGAGAAAAGCTGGCTGACCAGTACCCCATCTGCACAACGCC  
TrScrHCC CCCATGAACGCCTTCATGGTGTGGGCGCAGGCGGCGGAGGAAGCTGGCGGACCAGTATCCGCATCTGCACAACGCC  
LeOliS CCCATGAACGCCTTCATGGTGTGGGCGCAGGCGGCGGAGGAAGCTGGCGGACCAGTATCCGCATCTGCACAACGCC  
AnPlaSSDRY CCCATGAACGCCTTCATGGTGTGGGCCAGGCGGCGGAGGAAGCTGGCTGACCAGTACCCGCATCTGCACAACGCC  
LaChaTFS9 CCAATGAATGCCTTTATGGTCTGGGCTCAGGCTGCAAGAAGGAACTGGCTGATCAGTACCCCTCATCTCCATAATGCA  
XeLaeTFS1 CCAATGAACGCCTTCATGGTCTGGGCGCAGGCTGCAAGGAGGAAGCTGGCTGATCAGTACCCCATCTGCACAATGCA  
BuBufTFSP CCCATGAACGCCTTCATGGTGTGGGCGCAGGCTGCAAGGAGGAAGCTGGCCGACCAATACCCCATCTGCACAATGCA  
XeSilTFS9 CCCATGAACGCCTTCATGGTGTGGGCGCAGGCTGCAAGGAGGAAGCTGGCCGACCAATACCCCATCTGCACAATGCA  
BuGarS CCAATGAATGCCTTCATGGTGTGGGCGCAGGCTGCCAGGAGGAAGCTTGGCGGATCAGTACCCACATCTTCACAATGCA  
RhMarS CCAATGAATGCCTTCATGGTGTGGGCGCAGGCTGCCAGGAGGAAGCTTGGCGGATCAGTACCCACATCTTCACAATGCA  
GlRugSAA CCCATGAATGCCTTCATGGTGTGGGCGCAGGCTGCCCGGAGGAAGCTGGCAGACCAGTATCCCATCTGCACAATGCC  
PlWals CCCATGAACGCCTTCATGGTGTGGGCGCAGGCGGCGGAGGAAGCTGGCCGACCAGTACCCGCACCTGCACAACGCC  
ScCanS1 CCCATGAACGCCTTCATGGTGTGGGCGCAGGCGGCGGAGGAAGCTGGCCGACCAGTACCCCATCTGCACAACGCC  
DaRerHBTFS CCGATGAACGCCTTTATGGTGTGGGCGCAGGCGGCGGAGGAAGCTGGCCGACCAGTACCCCATCTGCACAACGCC  
MoAlbHBTf1 CCCATGAATGCCTTCATGGTGTGGGCTCAGGCTGCTCGGAGGAAGCTGGCAGATCAGTACCCACACCTGCATAACGCC  
OrNilTFS9a CCAATGAACGCCTTCATGGTGTGGGCTCAGGCTGCTCGGAGGAAGCTGGCGGATCAGTACCCGCACCTTCACAACGCC  
GaAcuTFS9a CCGATGAATGCCTTTATGGTGTGGGCGCAGGCGGCGGAGGAAGCTGGCTGATCAGTATCCTCACCTGCACAACGCC  
XiMacTFS9a CCGATGAACGCCTTCATGGTGTGGGCGCAGGCGGCGGAGGAAGCTGGCGGACCAGTACCCGCACCTTCACAACGCC  
TaRubTFS9b CCGATGAACGCCTTTATGGTGTGGGCCAGGCTGCACGGAGGAAGCTGGCGGATCAATACCCCATCTGCATAACGCC

TeNigTFS9a CCGATGAACGCGTTTCATGGTGTGGGCCAGGCCGCCGAGGAAGCTGGCCGATCAGTACCCACACTTGCATAACGCG  
OrLatSCC1 CCAATGAACGCCTTTCATGGTGTGGGGCAGGCCGCGCAGGAAAGCTCGCGGATCAGTACCCACCTGCACAACGCG  
AsMexTFS9a CCCATGAACGCGTTTCATGGTGTGGGGCAGGCCGCGCAGGAAAGCTGGCCGACAGTACCCACATCTCCACAACGCG  
GaMorS1 CCAATGAACGCGTTTCATGGTGTGGGGCAGGCCAGCGCAGGAAAGCTCGCGGACCAGTACCCACATCTCCACAACGCG  
MoAlbHBTFS CCCATGAACGCCTTTCATGGTGTGGGCTCAGGCTGCACGGAGGAAGCTGGCTGATCAATACCCACATCTGCACAACGCG  
OdBonTFS CCCATGAACGCATTTTCATGGTGTGGGCTCAAGCAGCACGAAGGAAAGCTGGCCGATCAATACCCGCATCTGCACAACGCA  
PoRetS CCCATGAACGCCTTTCATGGTTTGGGCTCAGGCCGCGCGGAGGAAGCTGGCCGATCAGTATCCGCATTTGCACAACGCA  
XiMacTFS9b CCCATGAACGCCTTTCATGGTTTGGGCTCAGGCCGCGCGGAGGAAGCTGGCCGATCAGTATCCGCATTTGCACAACGCA  
EpCoiS2 CCCATGAACGCATTCATGGTGTGGGCTCAAGCTGCACGACGGAAGCTGGCCGATCAATACCCGCATCTGCACAACGCG  
TaRubTFS9a CCCATGAACGCGTTTCATGGTGTGGGCCAGGCTGCACGGAGGAAGCTGGCCGATCAGTACCCGCATCTGCACAACGCG  
TeNigTFS9b CCCATGAACGCGTTTTCATGGTGTGGGCCAGGCTGCAGCGGAGGAAGCTGGCCGACCAGTACCCGCATCTGCACAACGCG  
OrNilTFS9b CCCATGAACGCGTTTCATGGTGTGGGCTCAAGCTGCACGGAGAAAGCTGGCCGATCAATACCCACACCTGCACAACGCA  
CiMonTFS9 CCCATGAACGCATTCATGGTGTGGGCTCAAGCTGCACGGAGAAAGCTGGCCGATCAATATCCACATCTGCACAACGCA  
CySemSHB CCCATGAACGCCTTTCATGGTTTGGGCACAAGCCGACGCGAGGAAAGCTGGCCGATCAATACCCGCATTTGCACAACGCA  
OrLatSCC CCCATGAATGCATTCATGGTCTGGGCTCAGGCAGCACGGAGGAAAGCTGGCCGACCAATACCCGCATTTGCACAACGCA  
GaAcuTFS9b CCCATGAATGCGTTTCATGGTGTGGGCTCAAGCCGCAAGGAGGAAGCTGGCCGATCAATACCCGCATTTGCACAATGCC  
SaSalTFS2 CCCATGAACGCTTTTCATGGTGTGGGCTCAAGCCGCCGAGGAAAGCTGGCCGACCAGTACCCACATCTCCACAATGCA  
GaMorS2 CCGATGAACGCCTTTCATGGTGTGGGCTCAGGCTGCACGGAGGAAGCTGGCCGACCAGTATCCACATCTCCACAACGCG  
AsMexTFS9b CCGATGAACGCGTTTTCATGGTGTGGGGCAGGCCGCGCGGAGGAAGCTTGGCCGACCAGTACCCGCATCTGCACAACGCG  
ClGarS CCAATGAACGCGTTTTCATGGTGTGGGGCAGGCCGCGCAGGAAAGCTGGCCGATCAATACCTCACCTTCATAACGCG  
CyCarHTF13 CCCATGAACGCGTTTTCATGGTTTGGGCTCAAGCCGCGCGCAGGAAAGCTGGCCGACCAGTATCCACACCTGCACAACGCG  
ClGarS1 CCAATGAACGCGTTTCATGGTGTGGGCCAGGCCGCGCGCCGCAAGCTCGCAGACCAGTACCTCACCTGCACAACGCG  
DaRerHBTf1 CCCATGAACGCGTTTTCATGGTTTGGGCTCAAGCCGCGCGGAGGAAAGCTGGCCGACCAGTACCCGCACCTGCACAACGCG

469

HoSapSSDR3 GAGCTCAGCAAGACGCTGGGCAAGCTCTGGAGACTTCTGAACGAGAGCGAGAAGCGGCCCTTCGTGGAGGAGGCCGAG  
MuMusSCG1 GAGCTCAGCAAGACTCTGGGCAAGCTCTGGAGGCTGCTGAACGAGAGCGAGAAGAGACCTTCGTGGAGGAGGCCGAG  
CaLupS1 GAGCTCAGCAAGACGCTGGGCAAGCTCTGGAGGCTGCTGAACGAGAGCGAGAAGCGGCCCTTCGTGGAGGAGGCCGAG  
GaGalSTF2 GAGCTCAGCAAGACGCTGGGCAAGCTGTGGAGGCTGCTGAATGAGAGCGAGAAGCGTCCCTTCGTGGAGGAGGCCGAG  
CoJapSSDRY GAGCTCAGCAAAACGCTGGGCAAGCTGTGGAGGCTGTTGAATGAGAGCGAGAAGCGTCCCTTCGTGGAGGAGGCCGAG  
AlMisS1 GAGCTGAGCAAAACCTGGGCAAGCTCTGGAGGCTGCTGAACGAAAGCGAGAAGCGCCATTCGTGGAGGAGGCCGAG  
TrScrHCC GAGCTCAGCAAAACCTGGGCAAACTCTGGAGGTTGCTGAATGAGAGCGAGAAGCGCCCTTCGTGGAGGAGGCCGAG  
LeOliS GAGCTCAGCAAAACGCTGGGCAAACTCTGGAGGTTGCTGAATGAAAGCGAGAAGCGCCCTTCGTGGAGGAGGCCGAG  
AnPlaSSDRY GAGCTCAGCAAGACCCTGGGCAAGCTCTGGAGGCTGCTGAATGAGAGCGAGAAGCGTCCCTTCGTGGAGGAGGCCGAG  
LaChaTFS9 GAACTCAGCAAAACTTTGGGAAAATTTGGAGGTTGCTCAATGAGAGCGAAAAGCGCCCTTCGTGAGAAGAGGCTGAG  
XeLaeTFS1 GAACTCAGCAAGACGCTGGGAAAAGTTATGGAGACTTCTGAATGAGGGTGAGAAAAGCGCCCTTCGTGGAGGAAAGCAGAG  
BuBufTFSP GAACTCAGCAAGACTCTGGGCAAGTTATGGAGACTTCTGAATGAGGGCGAGAAAAGCGCCCTTCGTGGAGGAAAGCAGAG  
XeSilTFS9 GAACTCAGCAAGACTCTGGGCAAGTTATGGAGACTTCTGAATGAGGGCGAGAAAAGCGCCCTTCGTGGAGGAAAGCAGAG  
BuGarS GAACTCAGCAAGACCCTGGGCAAGCTCTGGAGGCTGCTGAATGAGAGCGAGAAGCGTCCCTTCGTGTAAGAAGCTGAG  
RhMarS GAACTCAGCAAGACCCTGGGCAAGCTCTGGAGGCTGCTGAATGAGAGCGAGAAGCGTCCCTTCGTGTAAGAAGCTGAG  
GlRugSAA GAGCTCAGCAAGACCCTGGGCAAGCTGTGGAGGCTGCTGAATGAAAACCGAGAAGCGCCCTTCGTGGAGGAAAGCGGAG  
PlWals GAGCTCAGCAAGACACTGGGCAAGCTCTGGAGGCTGCTGAATGAGGGCGAGAAGCGCCCTTCGTGGAGGAAAGCAGAG  
ScCanS1 GAGCTAAGCAAAACCTGGGCAAACTCTGGAGACTGCTGAACGAGGGCGAAAAGCGCCCTTCGTGGAGGAAAGCAGAG  
DaRerHBTFS GAGCTCAGCAAAACTCTGGGAAAATTTGGAGATTACTGAACGAGGTGAAAAGCGTCCCTTCGTGGAGGAGGCAGAG  
MoAlbHBTf1 GAGCTCAGCAAAACTCTGGGAAAATGTGGAGGCTTCTCAATGAAGGCGAGAAGCGGCCGTTTCGTGGAAGAAGCTGAG  
OrNilTFS9a GAGCTCAGCAAGACACTCGGAAAATCTGGAGACTTCTCAATGAAGGAGAGAAGCGGCCGTTTCGTGGAGGAGGCTGAG  
GaAcuTFS9a GAGCTCAGCAAAACTCTGGGAAAATCTGGAGACTTCTGAATGAAGGGGAGAAGCGGCCGTTTCGTGGAGGAAAGCCGAA  
XiMacTFS9a GAGCTGAGCAAGACGCTGGGCAAGCTGTGGAGACTTCTCAACGAAGGCGAGAAGCGGCCGTTTCGTGGAAGAGGCCGAG  
TaRubTFS9b GAGCTCAGCAAGACACTGGGAAAATCTGGAGACTTTTGAATGAAGTCGAGAAGCGGCCGTTTCGTGGAAGAGGCTGAG  
TeNigTFS9a GAGCTCAGCAAGACGCTCGGAAAATCTGGAGACTGTTAAATGAAGTCGAGAAGCGGCCGTTTCGTGGAAGAGGCTGAG  
OrLatSCC1 GAGCTCAGCAAAACTCTGGGAAAAGCTGTGGAGACTTCTCAATGAGGGGAGAAGCGGCCGTTTCGTGGAGGAGGCCGAG  
AsMexTFS9a GAGCTCAGCAAAACCTGGGCAAGCTGTGGAGGCTTCTGAACGATGCAGAGAAGCGTCCCTTCGTGGAGGAGGCCGAA  
GaMorS1 GAGCTCAGCAAGACCCTCGGAAAATGTGGAGACTTCTCAACGAAGGCGAGAAAAGGCCGTTTCGTGGAGGAGGCTGAG  
MoAlbHBTFS GAACTCAGCAAAACACTGGGCAAACTTTGGAGATTGCTCAATGAGGTAGAAAAGCGTCCGTTTCGTGGAAGAAGCAGAG  
OdBonTFS GAGCTCAGCAAAACCTTTGGGAAAATTTGGAGATTGCTCAATGAGGTAGAGAAGCGCCGTTTCGTGGAGGAAAGCTGAG  
PoRetS GAACTCAGCAAAACCTGGGAAAATTTGGAGGCTTCTCAACGAGGTGAGAAGCGCCGTTTCGTGGAGGAAAGCTGAA  
XiMacTFS9b GAACTCAGCAAAACCTGGGAAAATTTGGAGGCTTCTCAATGAGGTGAGAGAAGCGCCGTTTCGTGGAGGAAAGCTGAA  
EpCoiS2 GAACTCAGCAAAACCTGGGCAAACTCTGGAGATTGCTCAACGAAGTAGAGAAGCGCCATTCGTGGAAGAAGCTGAG  
TaRubTFS9a GAATTGAGCAAAACTCTGGGCAAACTCTGGAGATTACTGAATGAGGTGAGAGAAGCGGCCGTTTCGTGGAGGAGGCAGAG  
TeNigTFS9b GAACTGAGCAAAACCTGGGCAAACTCTGGAGATTACTCAATGAGGTGAGAGAAGCGGCCGTTTCGTGGAGGAGGCAGAG  
OrNilTFS9b GAACTCAGCAAAACCTGGGCAAACTTTGGAGATTGCTCAATGAGGTAGAGAAGCGCCATTCGTGGAGGAGGCTGAG  
CiMonTFS9 GAACTCAGCAAAACCTTTGGCAAACTCTGGAGATTGCTCAATGAGGTAGAGAAGCGCCGTTTCGTGGAAGAGGCTGAG  
CySemSHB GAGCTCAGCAAAACTCTGGGCAAACTTTGGAGATTGCTCAACGAGGTGAGAAGCGTCCGTTTCGTGAGAGGAGGCAGAG  
OrLatSCC GAGCTCAGCAAAACTCTTTGGAAAATTTGGAGGCTCCTTAATGAGGTGAGAGAAGCGGCCGTTTCGTGGAGGAGGCTGAG  
GaAcuTFS9b GAACTCAGCAAAACCTGGGAAAATTTGGAGATTGCTCAACGAAGCAGAGAAGCGCCGTTTCGTGGAAGAAGCTGAG  
SaSalTFS2 GAACTCAGCAAAACCTCGGAAAATCTGGAGATTACTCAACGAAGGCGAGAAGCGTCCGTTTCGTAGAGGAGGCTGAA  
GaMorS2 GAACTCAGCAAGACTCTTTGGCAAACTTTGGAGACTTTTAAACGAAGGGGAGAAGCGCCGTTTCGTGGAAGAAGCCGAG  
AsMexTFS9b GAGCTCAGCAAGACCCTGGGAAAATGTGGAGGCTGCTGAACGAAGGTGAGAAGCGCCGTTTCGTGGAGGAGGCCGAG

ClGarS GAACTCAGCAAAACCCGGGGCAAACCTCTGGCGGCTGCTGAATGAAGGGGAGAAGCGGCCATTTGTTCGAAGAGGCTGAG  
CyCarHTF13 GAGCTCAGCAAGACCCTCGGAAAACCTCTGGAGGTTACTGAACGAGGGCGAGAAGCGTCCGTTTCGTGGAGGAGGCCGAG  
ClGarS1 GAGCTGAGCAAAACCCCTGGGCAAGTTATGGAGATTGCTGAACGATACAGAGAAGCGTCCATTCGTAGAAGAGGCTGAG  
DaRerHBTf1 GAGCTCAGCAAAACACTCGGCAAACCTCTGGAGACTGCTGAACGAGGGCGAGAAGCGTCCGTTTGTGGAGGAGGCCGAG

547

HoSapSSDR3 CGGCTGCGCGTGCAGCACAAGAAGGACCACCCGATTACAAGTACCAGCCCGCGGCGGAGGAAAGTCGGTGAAGAACGGG  
MuMusSCG1 CGGCTGCGCGTGCAGCACAAGAAAGACCACCCGATTACAAGTACCAGCCCGCGGCGGAGGAAAGTCGGTGAAGAACGGA  
CaLupS1 CGGCTGCGCGTGCAGCACAAGAAAGACCACCCGATTACAAGTACCAGCCCGCGGCGGAGGAAAGTCGGTGAAGAACGGC  
GaGalSTF2 CGGCTGCGGGTGCAGCACAAGAAGGACCACCCGACTACAAGTACCAACCACGCAGGAGGAAAGTCGGTGAAGAACGGG  
CoJapSSDRY CGGCTGCGGGTGCAGCACAAGAAGGACCACCCGACTACAAGTACCAACCACGCAGGAGGAAAGTCAGTGAAGAACGGG  
AlMisS1 CGGCTGCGGGTGCAGCACAAGAAGGACCACCCGACTACAAGTACCAGCCCGGAGGAGAAAAGTCGGTGAAGAACGGG  
TrScrHCC AGGCTGCGGGTGCAGCACAAGAAGGACCATCCCGACTACAAGTACCAGCCCGGAGGAGAAAAGTCAGTGAAGAAATGGG  
LeOliS AGGCTGCGGGTCCAGCACAAGAAGGACCATCCCGACTACAAGTACCAGCCCGGAGGAGAAAAGTCAGTGAAGAACGGG  
AnPlaSSDRY CGGCTGCGGGTGCAGCACAAGAAGGACCACCCGACTACAAGTACCAGCCACGGCGGAGGAAAGTCGGTGAAGAACGGG  
LaChaTFS9 CGACTGAGGGTCCAGCACAAGAAAGACCACCCGATTACAAGTACCAGCCCGGAGGAGAAAAGTCGGTCAAGAACGGG  
XeLaeTFS1 AGGCTGAGGGTCCAACACAAGAAGGATCATCCCGACTACAAGTATCAGCCACGGCGCAGAAAAGTCGGTTAAGAATGGG  
BuBufTFSP AGGCTGCGAATCCAACATAAGAAGGATCATCCAGACTACAAGTACCAGCCACGGCGCAGAAAAGTCGGTAAAGAATGGG  
XeSilTFS9 AGGCTGCGAATCCAACATAAGAAGGATCATCCAGACTACAAGTACCAGCCACGGCGCAGAAAAGTCGGTAAAGAATGGG  
BuGarS AGACTGAGAATCCAGCACAAGAAGGACCATCCCGACTACAAGTACCAGCCACGCAGAAAGAAAAGTCGGTCAAGAACGGT  
RhMarS AGGCTGAGAATCCAGCACAAGAAGGACCATCCCGACTACAAGTACCAGCCACGCCGAAGAAAAGTCAGTCAAGAACGGT  
GlRugSAA CGTCTGAGAATCCAGCACAAGAAGGATCACCCGACTACAAGTACCAGCCCGCGGTAGAAAAGTCGTGAAGAACGGG  
PlWalS AGACTGCGTGTCCAGCACAAGAAGGACCACCCGACTACAAGTACCAGCCCGCAGGCGGAAAGTCGTGAAGAACGGC  
ScCanS1 CGCCTGAGAGTGC AACACAAGGAGGACCACCCGATTACAATAACCAGCCAGGCGGAGAAAAGTCGGTGAAGAACGGG  
DaRerHBTfS CGCCTTCGGGTGCAGCACAAGAAAGATCACCCGACTATAAGTACCAGCCCGCGGCGGAGGAAAGTCGGTGAAGAACGGG  
OrAlbHBTfS CGCTCCGGGTGCAGCACAAGAAGGATCATCCCGACTACAATAATCAGCCCGCGGCGGAGGAAAGTCGGTGAAGAACGGT  
OrNilTFS9a CGTCTCGGGTGCAGCACAAGAAGGATCACCCGACTACAATAATCAGCCCGCGGCGGAGGAAAGTCGTAAAGAACGGG  
GaAcuTFS9a CGGCTCCGGGTGCAGCACAAGAAGGACCACCCGACTACAATAACCAGCCCGCGGCGGAGGAAAGTCGGTCAAGAACGGC  
XiMacTFS9a AGGCTCCGGGTGCAGCACAAGAAGGACCACCCGACTACAAGTACCAGCCCGCGGCGACGGAAGTCGGTGAAGAACGGC  
TaRubTFS9b CGGCTTCGGGTGCAGCACAAGAAGGATCACCCGACTACAAGTACCAGCCGAGGCGGAGGAAAGTCGTGAAGAACGGC  
TeNigTFS9a CGGCTCCGGGTCCAACACAAGAAGGATCACCCGACTACAAGTACCAGCCCGCGGCGAAGGAAAGTCGTGAAGAACGGC  
OrLatSCC1 CGGCTCCGCGTGCAGCATAAGAAGGACCACCCGACTACAAGTACCAGCCCGCAGCGCGGAAAGTCGGTGAAGAGCGGC  
AsMexTFS9a CGACTGCGAGTGCAGCACAAGAAGGATCACCCGACTACAAGTATCAGCCACGAGGAGGAAAGTCGGTGAAGAACGGC  
GaMorS1 CGACTCCGCGTGCAGCATAAGAAGGACCACCCGACTACAAGTACCAGCCCGCGGCGGAGGAAAGTCGGTGAAGAACGGC  
MoAlbHBTfS CGTTTGAGAGTGCAGCATAAGAAGGATCACCCGACTACAATAATCAGCCAAGGCGGAGAAAATCTGTCAAGAACGGG  
OdBonTfS CGACTCAGAGTGC AACATAAGAAGGATCACCCGACTACAATAATCAGCCAAGGCGGAGAAAATCTGGTCAAGAATGGT  
PoRetS CGCCTGAGAGTGCAGCACAAGAAGGATCACCCGACTATAAATATCAACCAGGCGGAGGAAATCTGTTAAGAATGGG  
XiMacTFS9b CGCCTGAGAGTGCAGCACAAGAAGGATCACCCGACTATAAATATCAACCAGGCGGAGGAAATCTGTTAAGAATGGG  
EpCois2 CGTCTGAGAGTGCAGCACAAGAAGGACCACCCGACTACAATAATCAGCCACGCGGAGGAAATCTGTCAAGAACGGG  
TaRubTFS9a CGTCTGAGGGTGCAGCACAAGAAAGACCACCCGACTACAAGTACCAGCCGAGGCGGAGAAAATCTGTTAAAAACGGC  
TeNigTFS9b CGTTTGAGGGTGCAGCACAAGAAAGACCACCCGACTACAAGTACCAACCAGGCGAAGGAAATCCGTCAAAAACGGG  
OrNilTFS9b CGTTTGCGAGTGC AACATAAGAAGGATCACCCGATTACAATAATCAGCCAAGGCGGAGAAAATCTGTCAAGAACGGG  
CiMonTFS9 CGTTTGAGAGTGC AACATAAGAAGGATCACCCGATTACAATAATCAGCCAAGGCGGAGAAAATCTGTCAAGAACGGG  
CySemSHB CGCCTGAGGGTGCAGCACAAGAAAGATCACCCGATTACAATAATCAGCCAAGGCGGAGAAAATCTGTCAAGAACGGA  
OrLatSCC CGACTGAGGGTCCAGCACAAGAAGGATCATCCCGACTATAAATACCAGCCAGGCGGAGAAAATCTGTCAAGAACGGT  
GaAcuTFS9b CGTTTGAGAGTCCAGCACAAGAAGGACCACCCGACTACAATAATCAGCCAGGCGGAGAAAATCTGGTAAAAACGGG  
SaSalTFS2 CGCTTGAGGGTGC AACACAAGAAAGATCACCCGACTACAAGTACCAGCCAGAAAGGAGAAAATCCGTGAAGAACGGG  
GaMorS2 CGCTTAAGGGTTCAACACAAGAAAGGACCACCCGACTACAATAACCAACCAGGCGGAGGAAATCTGTCAAAAACGGT  
AsMexTFS9b CGACTGAGGGTTCAGCACAAGAAGGACCATCCCGACTACAAGTACCAGCCGAGGAGGAGGAAAGTCGGTGAAGAACGGC  
ClGarS AGATTGCGAGTACAGCATAAGAAGATCATCCCGACTACAATAATCAGCCACGCGGCGGAGAAAGTGTAAAGGGCGGC  
CyCarHTF13 CGTCTGAGGGTGCAGCACAAGAAAGACCACCCGACTACAAGTACCAGCCACGAGGAGGAAAATCAGTGAAGAACGGC  
ClGarS1 CGCCTACGCGTGC AACACAAGAAAGATCATCCCGACTACAAGTACCAGCCACGGCGAAGGAAATCAGCCAAGAACGGT  
DaRerHBTf1 CGGCTGCGGGTCCAGCATAAGAAGGATCATCCAGACTACAATAACCAGCCAGACGAGGAAATCAGTGAAGAGCGGC

625

HoSapSSDR3 CAGGCGGAGGCAGAGGAGGCCACGGAGCAGACGCACATCTCCCCCAACGCCATCTTCAAGGCGCTGCAG---GCCGAC  
MuMusSCG1 CAAGCGGAGGCCGAAGAGGCCACGGAACAGACTCACATCTCTCCTAATGCTATCTTCAAGGCGCTGCAG---GCCGAC  
CaLupS1 CAGGCGGAGGCCGAGGAGGCCACCGAACAGACGCACATTTCCCCCAACGCCATCTTCAAGGCGCTGCAG---GCCGAC  
GaGalSTF2 CAGTCGGAGCAGGAGGAGGGCTCCGAGCAGACCCACATCTCCCCCAATGCCATCTTCAAGGCGCTGCAG---GCCGAC  
CoJapSSDRY CAGTCGGAGCAGGAGGAAAGGCTCCGAGCAGACCCACATCTCCCCCAATGCCATCTTCAAGGCGCTGCAG---GCCGAC  
AlMisS1 CAGTCGGAGCAGGAGGAGGGCTCCGAGCAAACCCACATCTCCCCCAATGCCATCTTCAAGGCGCTGCAG---GCCGAC  
TrScrHCC CAGTCGGAGCAGGAGGAGGGCTCCGAGCAAACACACATCTCCCCCAATGCCATTTTCAAGGCGCTGCAG---GCCGAT  
LeOliS CAGGCGGAGCAGGAGGAGGGCTCCGAGCAAACACACATCTCCCCCAATGCCATTTTCAAGGCGCTGCAG---GCCGAT  
AnPlaSSDRY CAGTCGGAGCAGGAGGAAAGGCTCCGAGCAGACCCACATCTCCCCCAACGCCATCTTCAAGGCGCTGCAG---GCCGAT  
LaChaTFS9 CAGAACGAGCAAGAGGAGGGCACCAGCAGACCCACATCTCCCCCACTGCTATCTTCAAGGCGCTACAG---GCTGAC  
XeLaeTFS1 CAGACAGAACAAGAGGATGGTGCTGAGCAAACCCACATCTCCCCCAATGCAATTTTCAAGGCGCTACAG---GCTGAC  
BuBufTFSP CAGTCAGAACAAGAGGACGGCGCTGAGCAAACCCACATCTCCCCCAATGCCATTTTCAAGGCGCTGCAG---GCTGAT  
XeSilTFS9 CAGTCAGAACAAGAGGACGGCGCTGAGCAAACCCACATCTCCCCCAATGCCATTTTCAAGGCGCTGCAG---GCTGAT

BuGarS CAGGCTGAGCAAGAGGACGGTTCCGAGCAGACCCACATCTCACCCAATGCCATCTTCAAGGCTCTGCAG---GCTGAC  
RhMarS CAGGCTGAGCAAGAGGACGGTTCCGAGCAGACCCACATCTCGCCCAATGCCATCTTCAAGGCTCTGCAG---GCTGAC  
GlRugSAA CAGTCTGAGCAAGAGGACGGTCCGACCAGACCCACATCTCTCCCAACGCCATCTTCAAGGCTCTGCAG---GCCGAC  
PlWals CAGGCGGAGACGGAGGAGGGCTCCGAGCAAACGCACATCTCTCCCAACGCCATCTTCAAGGCGTGCAG---GCCGAC  
ScCanS1 CAGGGGGAGAGCGAGGAGGGAGCCGAGCAGACGCACATCACCCCCAACGCCCTCTTCAAAGCCCTGCAG---GCGGAT  
DaRerHBTFS CAGAGCGAATCTGAAGACGGCAGCGAAACAGACCCACATCTCGCCCAACGCCATCTTCAAAGCGCTCCAGCAGGCGGAC  
MoAlbHBTf1 CAGAGCGAGCCTGAGGACGGCAGCGAGCAGACGCAC-----AATGCCATCTTCAAAGCGCTCCAACAGGCGGAC  
OrNilTFS9a CAAAGCGAGGGCGAGGACGGGAGCGAGCAGACGCACATTTCCCAACGCCATCTTCAAAGCTCTCCAGCAGGCGGAC  
GaAcuTFS9a CAGAGCGAGTCCGAGGACGGCAGTGCAGCAGACGCACATTTCCCAACGCCATCTTCAAAGCTCTCCAGCAGGCGGAC  
XiMacTFS9a CAGAGCGAGGCGGAGGACGGCGGGCAGCAGACGCACATCTCCACCAACGCCATTTTCAAAGCCCTCCAGCAGGCTGAC  
TaRubTFS9b CAGAACGAGTCCGACGACGGCAGCGAGCAGACGCACATTTCCCAACGCCATTTTCAAAGCTCTCCAACAGGCGGAC  
TeNigTFS9a CAGAACGAGTCCGACGACGGCGGGCAGCAGACGCACATTTCCCAACGCCAATTTTCAAAGCTCTCCAGCAGGCGGAC  
OrLatSCC1 GGGAGCGAGGCGGAGGACGGCGGGGAG-----CACATCTCCACCAACGCCATCTTCAAAGCTCTGCAGCAGGCGGAC  
AsMexTFS9a TCTGGCGAGGGGGAGGACGGCTCCGACCATGCTCAGTGTGCCTAACGCCATCTTCAAAGCCCTCCAGCAGGCGGAC  
GaMorS1 CAGGGAGAGTCCAGAGACGGCGGGAGCAGACGCACATCACGCCCAACGCCATATTCAAAGGCGTGCAGCAGGCGGAC  
MoAlbHBTFS CAAAACGAGCCCGAGGACAGC---GAGCAAACCTCACATCTCTCCAAATGCGATCTTCAAAGGCGTACAGCAGGCGGAC  
OdBonTFS CAAAGCGAGCCCGAGGACAAC---GAGCAAACCTCACATCTCTCCAAATGCGATCTTCAAAGCACTTTCAGCAGGCGGAC  
PoRetS CAAAATGAATCCGAGGATGGC---GAACAGACGCACATCTCTCCGAACGCAATTTTCAAAGGCGTGCAGCAAGCGGAC  
XiMacTFS9b CAAAATGACTCCGAGGATGGC---GAACAGACGCACATCTCTCCGAACGCAATTTTCAAAGGCGTGCAGCAAGCGGAC  
EpCois2 CAAAACGACCCCGAGGACGGC---GAGCAAACCCACATCTCTCCAAATGCCATATTCAAAGGCGTGCAGCAGGCGGAT  
TaRubTFS9a CAAAACGACCCCGAGGACGGA---GAGCAAACCCACATCTCACCCAATGCCATCTTCAAAGGCGTGCAGCAGGCGGAC  
TeNigTFS9b CAAAACGACTCCGAGGACGGA---GAGCAAACCCACATCTCACCCAATGCCATTTTCAAAGGCGTGCAGCAGGCGGAC  
OrNilTFS9b CAAAGCGAACCAGGAGGACAAC---GACCAAACCTCATATCTCTCCAAATGCCATTTTCAAAGGCGTGCAGCAGGCGGAC  
CiMonTFS9 CAAAGCGAAGCGGAGGACAGC---GAACAACTCACATCTCTCCAAATGCCATTTTCAAAGGCACTGCAGCAGGCGGAC  
CySemSHB CAAAATGAAGCAGACGACGGC---GAGCAGACGCACATTTCTCCGAATGCGATCTTCAAAGCCCTGCAGCAGGCGGAT  
OrLatSCC CAAAGCGAAGCGGAGGACAGC---GAACAACTCACATCTCTCCAAATGCGATCTTCAAAGGCGTGCAGCAGGCGGAC  
GaAcuTFS9b CAAAACGACCCCGAGGACGGC---GAGCAAACCCACATCTCTCCAAATGCCATTTTCAAAGGCTGCAGCAGGCTGAT  
SaSalTFS2 CAGAGCGAGCCAGAGGACGGC---GAGCAAACCCACATCTCTCCGGTGACATCTTAAAGCTCTCCAGCAAGCGGAC  
GaMorS2 CAGAGCGAGTCCGAAGACGGC---GAGCAAACACACATATCTCCAAATGCCATCTTCAAAGGCGTGCAGCAAGCGGAC  
AsMexTFS9b CAGTCCGAGTCCGAGGACGGC---GAGCAGACCCACATCTCGCCCAACGCCATCTTCAAAGCCCTGCAGCAAGCGGAC  
ClGarS CAGGGTGAACCCGAGGATAACC---GAGCACACCCACATTTCCCAACGCCATCTTCAAAGCCCTACAGGAGCGGAC  
CyCarHTF13 CAGAGCGAGAGCGAGGACGGC---GAGCAGACCCACATCTCACCCAACGCCATCTTCAAAGCCCTGCAGCAGGCGGAC  
ClGarS1 CAGGGCGAGGGGGAAGAGGGTCCCGAGCAGACGCACGTCTCCACCAACGCCATCTTCAAAGCACTGCAACAAGCGGAT  
DaRerHBTf1 TCAGCAGAGTCTGAAGATGGA---GAGCAGACGCAGATCTCCACCAATGCGCTGTTCAAGCCCTGCAGCGGGCAGAA

703

HoSapSSDR3 TCGCCACACTCCTCCTCCGGCATGAGCGAGGTGCACTCCCCCGGGCAGCACTCG---GGGCAATCCCAGGGCCCACCG  
MuMusSCG1 TCCCCACATTCTCCTCCTCCGGCATGAGTGAGGTGCACTCCCCGGGGCAGCACTCT---GGGCAATCTCAGGGTCCGCCG  
CaLupS1 TCGCCGCACTCCTCCTCCGGCATGAACGAGGTGCACTCCCCCGGCAAGCACTCG---GGGCAATCCCAGGGCCCAGCG  
GaGalSTF2 TCCCCGCACTCCTCCTCCAGCATCAGCGAGGTGCACTCCCCCGGGGAGCACTCA---GGGCAGTCCGAGGGCCCCCG  
CoJapSSDRY TCCCCACAGTCATCCTCCAGCATCAGCGAGGTGCACTCCCCAGGGGAGCACTCA---GGGCAGTCCAGGGCCCCCTCT  
AlMisS1 TCCCCGCACTCCTCCTCCAGCATGAGCGAGGTGCACTCCCCCGGGGAGCACTCT---GGGCAGTCCCAGGGCCCCCG  
TrScrHCC TCTCCTCAGTCTTCTCCTCCAGCATGAGCGAGGTGCACTCTCCCGGGGAGCACTCT---GGGCAGTCCCAGGGCCCCCG  
LeOliS TCTCCTCAGTCTTCTCCTCCAGCATGAGTGAGGTGCACTCTCCAGGAGAGCATTCA---GGGCAGTCCCAGGGCCCCCG  
AnPlaSSDRY TCCCCGCACTCCTCCTCCAGCATCAGCGAGGTGCACTCCCCCGGGGAGCACTCG---GGGCAATCCGAGGGCCCCCG  
LaChaTFS9 TCGCCCCACTCTGCTTCAAGTATGAGCGAGGTCCACTCTCCTGGGGAACACTCA---GGCCAGTCCCAGGGCCCCCG  
XeLaeTFS1 TCCCCGCACTCCTCCTCCAGCATGAGCGAAGTCCACTCTCCTGGAGAACATTC---GGTCAATCCCAGGGCCCACCA  
BuBufTFS9 TCCCCACATTCTGCCTCCAGCATGAGCGAAGTCCACTCTCCTGGAGAACATTC---GGTCAATCCCAGGGCCCACCA  
XeSilTFS9 TCCCCACATTCTGCCTCCAGCATGAGCGAAGTCCACTCTCCTGGAGAACATTC---GGTCAATCCCAGGGCCCACCA  
BuGarS TCCCCACATTCTGCCTCCAGCATGAGCGAGGTGCACTCCCCAGGGGAGCACTCA---GGTCAATCCCAGGGCCCACCA  
RhMarS TCCCCACATTCTGCCTCCAGCATGAGCGAGGTGCACTCCCCCGGGGAGCACTCA---GGTCAATCCCAGGGGCCACCA  
GlRugSAA TCGCCGCACTCTGCTTCCAGCATGAGCGAAGTGCATCTCCAGGAGAACACTCA---GGGCAGTCCGAGGGTCCACCA  
PlWals TCACCGCACTCATCCTCCGGCATGAGCGAGGTGCACTCGCCCGGAGAGCACTCT---GGCCAGTCCCAGGGTCCACCC  
ScCanS1 TCCCCGCACTCCGCCTCCAGCATGAGCGACGTGCACTTCCCCAGGGGAACATTC---GGACAATCTCAAAGGACCACCA  
DaRerHBTFS TCGCCC-----GCGTCCAGCATGGGAGAAGTGCATCTCGCCAGCGAACACTCA---GGCCAGTCCCAGGGGCCGCC  
MoAlbHBTf1 TCTCCG-----GCCTCCAGCATGGGAGAGGTGCACTTCTCCGAGTGAGCACTCA---GGC---TCCCAGGGGCCCCCT  
OrNilTFS9a TCCCCCT-----GCATCCAGCATGGGAGAGGTGCACTTCTCCTGGAGAGCACTCA---GGC---TCCCAGGGTCCCCCT  
GaAcuTFS9a TCCCCA-----GCCTCCAGCATGGGAGAGGTGCACTCACCGGGTGAGCACTCA---GGC---TCCCAGGGGCCCCCT  
XiMacTFS9a TCCCCC-----GCCTCCAGCATGGGAGAGGTGCACTCCCCCGGGGAGCACTCA---GGC---TCCAGGGTCCCCC  
TaRubTFS9b TCCCCA-----GCCTCCAGCATGGGAGAGGTGCACTTCCAGGTGAGCACTCA---GGC---TCTCAGGGCCCTCT  
TeNigTFS9a TCCCCG-----GCCTCCAGCATGGGAGAGGTGCACTCTCCAGGTGAGCACTCA---GGC---TCTCAGGGTCTCTC  
OrLatSCC1 TCCCCC-----GCCTCCAGCATGGGAGAGGTGCACTCCCCCGGGGAGCACTCA---GGC---TCCAGGCACTCCCCA  
AsMexTFS9a TCCCCG-----GCGTCCAGCATGGGAGAGGTGCACTCGCCAGCGAACAAGGA---GGCCAGTCCCAGGGTCCCCCG  
GaMorS1 TCCCCG-----GCCTCCAGCATGGGGGACGTGCACTCACCTGGCGAGCACTCA---GGC---TCCCAGGGGCCCCCG  
MoAlbHBTFS TCTCCG-----GCGTCCAGTATGGGCGAGGTGCACTCTCCAGGCGACCATTCA---GGTCAATCCCAGGGTCCGCCA  
OdBonTFS TCTCCA-----GCGTCCAGTATGGGCGAGGTGCACTCTCCTGGAGAACATTC---GGTCAATCCCAGGGTCCGCCA  
PoRetS TCTCCT-----GCGTCCAGCATGGGCGAGGTGCACTCACAGGAGAACATTCG---GGTCAATCCCAGGGACCACCA  
XiMacTFS9b TCTCCT-----GCGTCCAGCATGGGCGAGGTGCACTCTCCGGGAGAACATTCG---GGTCAATCCCAGGGACCACCA

EpCois2 TCTCCT-----GCGTCCAGTATGGGCGAGGTGCATTCTCCAGGAGAGCACTCA---GGTCAGTCCCAGGGCCACCG  
TaRubTFS9a TCCCCA-----GCCTCGAGTTTGGGCGAAGTTCATTCTCCAGGCGATCACTCA---GGTCAGTCCCAGGGCCCGCCG  
TeNigTFS9b TCCCCA-----GCCTCGAGTTTGGGCGAAGTTCATTCTCCAGGCGAGCACTCA---GGTCAGTCCCAGGGCCACCG  
OrNilTFS9b TCTCCG-----GCTTCAAGTATGGGCGAGGTGCATTCTCCGGGAGAGCAATTCA---GGTCAGTCCACAGGGTCCACCA  
CiMonTFS9 TCTCCG-----GCTTCAAGCATGGGCGAGGTGCATTCTCCAGGAGAGCACTCA---GGTCAGTCCACAGGGTCCACCG  
CySemSHB TCCCCCT-----GCGTCCAGTATGGGCGAGGTGCATTCTCCA---GAACATTCA---GGTCAATCCCAAGGTCCACCC  
OrLatSCC TCTCCT-----GCGTCCAGCATGGGCGAGGCGACTCTCCAGGAGAACATTCA---GGTCAGTCCACAGGGCCACCA  
GaAcuTFS9b TCTCCA-----GCTTCAAGTTCGGGCGAGGTGCATTCTCCAGGAGAGCAATTCA---GGTCCGTCCCAGGGCCCTCCA  
SaSalTFS2 TCACCC-----GCGTCCAGCATGGGCGAAGTGCATTCTCCCGGTGAACATTTCAGCAGGCCAGTCCCAGGGCCACCT  
GaMorS2 TCCCCA-----ACCTCTAGCATGGGGGAGGTGCATTCTCCCCGGGAGCACTCA---GGTCAGTCCCAAGGCCACCG  
AsMexTFS9b TCGCCC-----GCCTCCAGCATGGGCGAAGTGCATTCTCCCCCTCAGACCACTCA---GGTCAATCCCAAGGTCTCTCCA  
ClGarS TCTCCC-----GCTTCCAGCATGGGTGAGGTACTCTCTCCGGAGACCACTCA---GGTCAGTCCCAGGGCCCTCCA  
CyCarHTF13 TCCCCC-----GCGTCCAGCATGGGCGAAGTGCATTCTCCGGGAGACCACTCA---GGTCAGTCCCAGGGTCCCCCG  
ClGarS1 TCTCCA-----GCATCCAGCATGGGAGAGGTGCATTCTCCCCAGCGAGCAGTCA---GGCCAGTCCCAGGGTCCCCCG  
DaRerHBTf1 ACACCC-----GACTCCAGCACCGGCGAGCTGCATTCTCTGGAGAACACTCC---GGTCAGTCTCAGGGCCCCCCC

781

HoSapSSDR3 ACCCCACCCACCACCCCAAAAACCGACGTG---CAGCCGGGCAAGGCTGAC---CTGAAGCGAGAG-----GGG---  
MuMusSCG1 ACCCCACCCACCACCTCCCAAAAACCGACGTG---CAAGCTGGCAAAGTTGAT---CTGAAGCGAGAG-----GGG---  
CaLupS1 ACGCCCCCACCACCCCGAAAACCGACGTG---CAGCCGGGCAAGGCTGAC---CTGAAGCGCGAG-----GGC---  
GaGalSTF2 ACGCCCCCACCACCCCAAAAACCGACGCTCAGCAGCCGGGCAAGCAGGAC---CTGAAGCGCGAG-----GGC---  
CoJapSSDRY ACACCCCCACCACCTCCCAAGACGGACGCTCAGCAGCCGGGCAAGCAGGAC---CTGAAGCGCGAG-----GGC---  
AlMisS1 ACACCACCCACGACCCCAAAAACAGACGTC---CAGCCTGGCAAGCAAGAC---CTGAAGCGAGAA-----GGA---  
TrScrHCC ACCCCTCCTACTACACCAAAAACAGATGTC---CAGCCTGGGAAGCAAGAC---CTGAAGCGAGAA-----GGG---  
LeOliS ACTCCTCCTACTACACCAAAAACAGATGTC---CAGCCTGGGAAGCAAGAC---CTGAAGCAAGAA-----GGG---  
AnPlaSSDRY ACGCCCCCACCACCCCAAGACGGACGCG---CAGCCGGGCAAGCAGGAC---CTGAAGCGCGAG-----GGC---  
LaChaTFS9 ACTCCCCCTACTACTCCCAAAAACAGATGTC---CAGCCAGGAAAACAGAT---CTGAAACGAGAG-----GTA---  
XeLaeTFS1 ACTCCTCCAACTACTCCCAAGACAGATATC---CAGCCTGGAAAAGCCAGAC---CTAAAAGAGGGAG-----GGC---  
BuBufTFSP ACTCCTCCAACTACCCCAAGACAGACGTC---CAGCCTGGAAAAGCCAGAC---CTGAAGAGGGAG-----GGC---  
XeSilTFS9 ACTCCTCCAACTACCCCAAGACAGACGTC---CAGCCTGGAAAAGCCAGAC---CTGAAGAGGGAG-----GGC---  
BuGarS ACTCCACCAACCACCCCTAAAACAGATGTG---CAGCCCGGCAAGCCAGAC---CTGAAGCGCGAA-----GGA---  
RhMarS ACTCCACCGACCACCCCTAAAACAGATGTC---CAGCCCGGCAAGCCAGAC---TTGAAGCGTGAA-----GGA---  
GlRugSAA ACTCCGCGGACCACCCCTAAAACAGATGTG---CAGCCCGGCAAGCCAGAT---CTGAAACGCGAA-----GGT---  
PlWalS ACACCTCCAACTACCCCAAAAACCGACGTT---CAGCCAGGGAAAACCTGAC---CTGAAGCGGGAA-----GGA---  
ScCanS1 ACGCCCCCACCACCTCCCAAAAACAGAGGTT---CAGCCTGTAAAACAGAT---CTGAAACGTGAA-----GGT---  
DaRerHBTfS ACTCCTCCCACCACCCCGAAAACAGACTGATGTACCTCA---GGCAAAGCTGGAC---CTGAAACGAGAGGCC-----  
MoAlbHBTf1 ACCCCTCCCACCACCCCAAGACTGATGTACCTCA---GGCAAAGCTGGAC---CTAAAAGCTGAAGGGGGGCTC---  
OrNilTFS9a ACCCCTCCCACCACCCCAAGACTGATGTACCTCA---GGCAAAGCTGGAC---CTAAAAGCTGAAGTAGGCCCTC---  
GaAcuTFS9a ACTCCTCCCACCACCCCAAGACTGATGTACCTCG---GGCAAAGCTGGAC---CTAAAAGCTGAAGGTGGCCTC---  
XiMacTFS9a ACCCCTCCCACCACCCCTAAGACCGACTTGGCTCA---GGTAAAGACGGAC---CTGAAGCGGAGGGCGGGGCTC---  
TaRubTFS9b ACCCCTCCCACCACCCCAAGACTGATGTACCTCA---GTCAAAGATGGAT---CTAAAAGCTGAAGGGCGGCTC---  
TeNigTFS9a ACCCCTCCCAGTACCCCAAGACTGATGTACCTCA---GTCAAAGATAGAT---CTCAAACGTGAAGGCAGCCTT---  
OrLatSCC1 ACCCCTCCCACCACCCCAAGACGGACTGC---TCA---GCAAAGATGGAC---CTAAAAGCTGAGGGGGGGCTG---  
AsMexTFS9a ACTCCCCCACCACCCCAAAAACAGACGTCATCTCA---GGCAAAGCTGGAC---CTTAAAGCGGAGGGC-----  
GaMorS1 ACTCCTCCCACCACCCCAAAAACAGACGTCATCTCA---GGCAAAGCTGGAC---CTGAAGCGGAGGCGGGCCTG---  
MoAlbHBTfS ACACCCCAACCACCCCAAAAACAGACCTTCTCTCC---AGCAAAGCTGAT---CTGAAGCGTGAG-----GGA---  
OdBonTfS ACACCCCAACAACCCCAAGACAGACGTCCTCCACC---AGTAAAGCTGAC---CTAAAAGCTGAG-----GGA---  
PoRetS ACACCCCGACAACCCCAAGACAGATCTTCCCTCC---AGTAAAGCTGAC---CTGAAGCGTGAG-----GGC---  
XiMacTFS9b ACACCTCCGACAACCCCAAGACAGATCTTCCCTCC---AGCAAAGCTGAC---CTGAAGCGTGAG-----GGC---  
EpCois2 ACCACCCCAACCACCCCAAGACAGACTTCCCTCC---AGCAAAGCTGAC---CTGAAAGCTGAG-----GGG---  
TaRubTFS9a ACACCCCGACCACCTCCCAAGACGGACTTGGTCTCC---AGCAAAGCTGAT---CTGAAACGTGAG-----GGG---  
TeNigTFS9b ACACCCCGACCACCTCCCAAGACAGACCTGGTCTCT---GGCAAAGCTGAT---CTGAAACGAGAG-----GGC---  
OrNilTFS9b ACACCCCAACCACCCCAAGACAGACCTTCCCTCC---AGCAAAGCTGAT---CTGAAACGTGAG-----GGG---  
CiMonTFS9 ACACCCCAACCACCCCGAAGACAGACCTTCCCTCC---AGCAAACCTGAC---CTGAAGCGTGAG-----GGG---  
CySemSHB ACACCCCGACCACCCCTAAAACAGACATGCCCTCC---AATAAAGCCGAA---CTGAAGCGTGAA-----GGG---  
OrLatSCC ACACCCCAACAACCCCAAGACAGATCTTCCCTCC---AGCAAAGCTGAC---CTGAAGCGCGAG-----GGC---  
GaAcuTFS9b ACACCCCAACCACCCCAAGACAGACCTGCCCTCC---AGCAAAGCTGAC---CTGAAGCGGAGAG-----GGT---  
SaSalTFS2 ACACCACCGACCACCCCAAAAACAGACCTGGCTGCG---GGCAAAGCCGAC---CTGAAGCGTGAG-----GGC---  
GaMorS2 ACGCCCCCACCACCCCAAGACCGACTGCCCTCAGGGGGCAAGGGGGGAGATCCTGAAGCGCGAGGCTTCCGGG---  
AsMexTFS9b ACGCCACCGACAACCCCTAAAACAGACCTTCCCGG---AGCAAACAGAC---CTAAAAGCGCGAG-----GGA---  
ClGarS ACTCCCCCACAACCTCCCAAAAACAGATGTTCCAAGT---GTGAAAACCGGAC---CTGAAGCGGAGAG-----GGC---  
CyCarHTF13 ACTCCTCCCACGACCCCAAAAACCGACTGCCCTCC---AGCAAAGCGGAT---CTGAAAGCGCGAG-----GGC---  
ClGarS1 ACTCCACCCACCACCCCAAAAATTGATGTCTAGGCA---GGCAAAGCTGAG---CTAAAAGCTGAG-----GGA---  
DaRerHBTf1 ACACCACCCACCACCCCTAAAACAGATCTGCCGGTGTGAGTAAAGCGGAT---CTGAAGCGGGAGCGGGAGCGGGAC

859

HoSapSSDR3 -----CGCCCTTGCCAGAGGGG-----GGCAGACAGCCCCCT---ATCGACTTC  
MuMusSCG1 -----CGCCCTCTGGCAGAGGGG-----GGCAGACAGCCCCC---ATCGACTTC



|            |                                                                                |
|------------|--------------------------------------------------------------------------------|
| CaLupS1    | -----CGCCCCCTGCCCCGAGGGG-----GGCCGACAGCCCCC---ATCGACTTC                        |
| GaGalSTF2  | -----CCTTTGGCGGAAGGC-----GGCCGCCAACCTCCCCACATCGATTTT                           |
| CoJapSSDRY | -----CGCCCTTTGGCAGAAGGT-----GGCCGCCAACCTCCCCACATCGATTTT                        |
| AlMisS1    | -----CGCCCCCTGCAAGAGGGA-----GGCGCCAGCCGCCCCACATTGACTTT                         |
| TrScrHCC   | -----CGCCCTTTGCAGGAAGGA-----GGAAGACAGCCGCCCCACATTGACTTC                        |
| LeOliS     | -----CGCCCTTTGCAGGAAGGG-----GGAAGACAACCGCCACACATTGACTTC                        |
| AnPlaSSDRY | -----CGCCCTTTGCAAGAAGGC-----GGCCGGCAGCCGCCCCACATCGACTTC                        |
| LaChaTFS9  | -----CGCCCCCTACAGGAAGGT-----GGAAGGCAG---CCACACATTGACTTT                        |
| XeLaeTFS1  | -----AGGCCACTGCAAGAGAAC-----GGTAGGCAGCCACCTCACATTGATTTT                        |
| BuBufTFSP  | -----AGGCCACTGCAGGAGAGC-----GGTAGGCAGCCACCTCACATCGATTTT                        |
| XeSilTFS9  | -----AGGCCACTGCAGGAGAGC-----GGTAGGCAGCCACCTCACATCGATTTT                        |
| BuGarS     | -----CGCACCTGCAAGAGAGC-----GGCCGCCAGCCCCCTCATATTGATTTT                         |
| RhMarS     | -----CGCACCTGCAAGAAAGC-----GGCCGCCAGCCCCCTCACATTGATTTT                         |
| GlRugSAA   | -----CGCCCCCTGCAGGAGAGC-----GGCCGCCAGCCACCCACATCGATTTT                         |
| PlWalS     | -----CGCCCTCTCCAGGAGGAA-----GGGAGACAGCTCCCCACATTGACTTC                         |
| ScCanS1    | -----CGCCCCCTGCAGGAAGGC-----GGGAGACAG---CCTCACATTGATTTT                        |
| DaRerHBTFS | -----CGTCCTCTTCAGGAAAAC-----ACC-----GGACGTCCG---CTCAGCATCAACTTC                |
| MoAlbHBTf1 | -----CGCTCTCTGCCCCGATGGG-----TCTGGT-----GGGCGCCAG---CTCGACATCGACTTC            |
| OrNilTFS9a | -----CGCTCCCTGCCTGATGGT-----CCCGGT-----GGGCGACAG---CTCAACATCGACTTC             |
| GaAcuTFS9a | -----CGCTCCCTGTCCGACGGC-----ACCGGC-----GGCCGCCAG---CTCAACATCGACTTC             |
| XiMacTFS9a | -----CGCGCTCTGCCCCGACGGC-----AATGTT-----GGGCGCCAG---CTCAACATCGACTTC            |
| TaRubTFS9b | -----CGCTCTCTGAACGATGGC-----CCCGGA-----GGACGTCAG---CTCAACATCGACTTC             |
| TeNigTFS9a | -----CGCACTCTGACCGATGGC-----CCCGGC-----GGACGTCAG---CTCAACATCGACTTC             |
| OrLatSCC1  | -----CGCCCCTGCCGGACGGC-----GCCCCC-----GGACGCCAG---CTCAACATCGACTTC              |
| AsMexTFS9a | -----CGGCCGCTCCAGGAAGGCGTCAGCAGTGGC-----GGACGGCAG---CTCAACATCGACTTC            |
| GaMorS1    | -----CGCCCCGCTCAGGACGGCCCCCTCCCCCTCCGCCGCCGCCGCGTGGGCCGCCAG---CTCAACATCGACTTC  |
| MoAlbHBTFS | -----CGCCCCATGCAGGAGGGGCACC-----AGTCGCCAG---CTTAACATTGACTTC                    |
| OdBonTFS   | -----CGGCCCATGCAGGAGGGGCACC-----AGCCGCCAG---CTCAACATTGACTTTT                   |
| PoRetS     | -----CGCCCCATTCAAGAGGGGCAGC-----AGTCGGCAG---CTCAACATAGACTTTT                   |
| XiMacTFS9b | -----CGCCCCATTCAAGAGGGGCAGC-----AGTCGGCAG---CTCAACATCGACTTTT                   |
| EpCois2    | -----CGCCCCATGCAGGAGGGGCACC-----AGTCGCCAG---CTCAACATCGACTTTT                   |
| TaRubTFS9a | -----CGCCCCATGCAGGAGGGGCACC-----AGCCGCCAG---CTCAACATCGACTTC                    |
| TeNigTFS9b | -----CGGCCACGCAGGAGGGGCACA-----AGCCGTCAG---CTCAACATCGACTTC                     |
| OrNilTFS9b | -----CGGCCCATGCAGGAGGGGCACT-----AGCCGCCAG---CTCAACATTGATTTT                    |
| CiMonTFS9  | -----CGGCCCATGCAGGAGGGGCACT-----AGTCGCCAG---CTCAACATTGATTTT                    |
| CySemSHB   | -----CGACCCATGCAGGAGGGGCACC-----AGTCGTCAG---CTCAACATCGACTTTT                   |
| OrLatSCC   | -----CGCCCCAGTGAAGAGGGGCACC-----AGCCGCCAG---CTCAACATAGACTTTT                   |
| GaAcuTFS9b | -----CGCCCCATGCAGGAGGGGCACC-----AGCCGCCAG---CTCAACATCGACTTTT                   |
| SaSalTFS2  | -----CGCCCCCTGCAAGAGGGGCAGC-----GGCCGCCAG---CTCAACATCGACTTC                    |
| GaMorS2    | -----CGTCCCGCGCCGGAGGGC-----CGCCAG---CTCAACATCGACTTTT                          |
| AsMexTFS9b | -----CGCCCCCTGCAGGATGGTGCC-----GGTCGCCAG---CTCAACATCGACTTC                     |
| ClGarS     | -----CGTCCACTTCCCAGGGGCACA-----GGCCGCCAA---CTTAACATCGACTTC                     |
| CyCarHTF13 | -----CGTCCGCTGCAGGAGGGC-----ATTGACTTC                                          |
| ClGarS1    | -----CGCCCATTGCAGGATGGCACCGCAGTTACCGTTGGCTCTGGCGGGCAGCGTCAG---CTTAACATCGACTTTT |
| DaRerHBTf1 | CGAGAGCGCCCCCTGCAGGACGGC-----ATTGACTTC                                         |

937

|            |                                                                                  |
|------------|----------------------------------------------------------------------------------|
| HoSapSSDR3 | CGCGACGTGGACATCGGGGAGCTGAGCAGCGACGTCATCTCCAACATCGAGACCTTTCGATGTCAACGAGTTTGACCAG  |
| MuMusSCG1  | CGCGACGTGGACATCGGTGAAGCTGAGCAGCGACGTCATCTCCAACATTCGAGACCTTCGACGTCAATGAGTTTGACCAA |
| CaLupS1    | CGCGACGTGGACATCGGGGAGCTGAGCAGCGACGTCATCTCCAACATAGAGACCTTCGACGTCAACGAAATTCGACCAG  |
| GaGalSTF2  | CGAGACGTGGACATCGGGGAGCTGAGCAGCGACGTCATCTCCAACATCGAAACCTTCGACGTCAACGAGTTTGACCAA   |
| CoJapSSDRY | CGAGACGTGGACATCGGTGAAGCTGAGCAGCGACGTCATCTCCAACATCGAAACCTTTGACGTCAACGAGTTTGACCAA  |
| AlMisS1    | CGAGACGTGGACATCGGGGAGCTGAGCAGCGATGTCATCTCCAACATCGAGACCTTCGACGTCAACGAGTTTGACCAG   |
| TrScrHCC   | CGGGATGTGGACATTGGGGAAGCTGAGCAGCGACGTCATCTCCAACATAGAGACCTTTGATGTCAATGAGTTTGACCAG  |
| LeOliS     | CGGGATGTGGACATTGGGGAAGCTGAGCAGCGACGTCATCTCCAACATAGAGACCTTTGACGTAAATGAGTTTGACCAG  |
| AnPlaSSDRY | CGAGACGTGACATCGGGGAGCTGAGCAGCGACGTCATCTCCAACATCGAAACCTTCGACGTCAACGAAATTCGACCAG   |
| LaChaTFS9  | AGAGATGTGGACATAGGAGAGCTAAGCAGTGATGTCATCTCCAACATAGAAAGCTTCGATGTCAATGAGTTTGACCAG   |
| XeLaeTFS1  | CGAGATGTGGACATTGGTGAGCTGAGCAGTGAGGTTCATCTCCACCATTGAAACCTTTGATGTCAATGAATTTGACCAA  |
| BuBufTFSP  | CGAGATGTAGATATTGGTGAAGCTGAGCAGTGAGGTTCATCTTACCATCGAAACCTTTGATGTCAATGAATTTGACCAA  |
| XeSilTFS9  | CGAGATGTAGATATTGGTGAAGCTGAGCAGTGAGGTTCATCTTACCATCGAAACCTTTGATGTCAATGAATTTGACCAA  |
| BuGarS     | CGGGACGTGGACATTGGAGAGCTGAGCAGCGAGGTGATCTCCAATATTGAGGCCTTTGATGTCAATGAATTCGACCAG   |
| RhMarS     | CGGGACGTGGACATTGGAGAGCTGAGCAGCGAGGTGATCTCCAACATTCGAGGCCTTTGATGTCAATGAATTCGACCAG  |
| GlRugSAA   | CGCGACGTGGACATCGGAGAGCTGAGCAGCGAGGTTCATCTCCAACATCGAGACCTTCGACGTCAACGAGTTTGACCAG  |
| PlWalS     | GGGGATGTGGACATCTCGGTGCTGAGCAGTGACGTCATCTCTAACTTTACTCCCATCGACATCCAGGAGTTTGATCAA   |
| ScCanS1    | AGCAATGTGGACATTGGGGAAGCTGAGCAGCGAAGTCATGTGGAACATGGAAACCTTCGACGTCAACGAGTTTGACCAG  |
| DaRerHBTFS | CAGGACGTGGATATCGGGGAGCTGAGCAGCGATGTT-----ATCGAAACATTCGACGTCAATGAGTTTGACCAG       |
| MoAlbHBTf1 | CATGATGTGGACATTGGTGAGTTGAGCAGCGATGTCATCTCCACATTCGAAACCTTTGATGTCAATGAGTTTGACCAG   |
| OrNilTFS9a | CGCGACGTGGACATCGGGGAGCTGAGCAGTGATGTCATCTCCCATATTGAGACCTTCGATGTCAACGAGTTTGACCAG   |

GaAcuTFS9a CGCGACGTGGACATCGGGCAGCTGAGCAGCGACGTCATCTCCCACATCGAGACCTTTCGACGTCAACGAGTTTCGACCAG  
 XiMacTFS9a CGGGACGTGGACATCGGGCAGCTGAGCAGCGACGTCATCTCCCACATCGAGACCTTTCGATGTCAACGAGTTTCGACCAG  
 TaRubTFS9b CGTGACGTGGATATTGGCGAGCTGAGCAGTGACGTCATCTCCCACATCGAGACCTTTCGATGTCAACGAGTTTCGACCAG  
 TeNigTFS9a CGTGACGTGGATATTGGCGAGCTTAGCAGCGACGTCATCTCCCACATCGAGACCTTTCGATGTCAACGAGTTTCGACCAG  
 OrLatSCC1 CGTGACGTGGACATCGGGCAGCTGAGCAGTGACGTCATCTCCCACATCGAGACCTTTCGACGTCAACGAGTTTCGACCAG  
 AsMexTFS9a CGTGATGTGGACATCGGGCAGCTGAGCAGTGACGTCATCTCACACATGGAGAGCTTTCGACGTGGCTGAGTTTCGACCAG  
 GaMorS1 CGCGACGTGGACATCGGGCAGCTGAGCAGCGACGTCATCTCCCACATCGAGACCTTTCGACGTCAACGAGTTTCGACCAG  
 MoAlbHBTFS GGAGCTGTGGATATTGGTGAGCTGAGCAGCGATGTTCATCTCCAACATGGGGAGCTTTCGATGTGGATGAGTTTCGATCAG  
 OdBonTFS GGAGCTGTGGACATCGGGCAGCTGAGCAGCGAAGTCATCTCCAACATGGGAAGCTTTCGATGTTCGATGAGTTTCGATCAG  
 PoRetS GGAGCTGTGGACATTGGTGAGCTTAGCAGCGACGTCATCTCCAACATCGGCAGCTTTCGATGTTCGATGAGTTTCGACCAG  
 XiMacTFS9b GGAGCTGTGGACATTGGTGAGCTTAGCAGCGACGTCATCTCCAACATCGGGAGCTTTCGATGTTCGATGAGTTTCGACCAG  
 EpCois2 GGAGCTGTGGACATTAATGAGCTGAGCAGCGAGGTCATCTCCAACATCGGGAGCTTTCGATGTTCGACGAGTTTCGATCAG  
 TaRubTFS9a GGAGCCGTGGACATTGGCGAGCTGAGCAGCGAGGTCATTTCCAACATGGGCAGCTTTCGACGTGGACGAGTTTCGACCAG  
 TeNigTFS9b GCGCGCGTGGACATCGGGCAGCTGAGCAGCGAGGTCATTTCCAACATGGGGAGCTTTCGACGTGGACGAGTTTCGACCAG  
 OrNilTFS9b GGAGCTGTGGACATTGGTGAGCTGAGCAGCTGATGTTCATCTCCAATATAGGAAGCTTTCGATGTTCGATGAGTTTCGATCAG  
 CiMonTFS9 GGAGCTGTGGACATTGGTGAGCTGAGCAGTGATGTTCATCTCCAACATGGGAAGCTTTCGATGTTCACGAGTTTCGATCAG  
 CySemSHB GGAGCGGTGGACATCGGGCAGTTGAGCAGCGACGTCATCTCCAACATGGGGAGCTTTCGACGTTCGATGAGTTTCGATCAG  
 OrLatSCC GGCAGTGTGGACATCGGTGAGCTGAGCAGCGACGTCATCTCCAACATCGGCAGCTTTCGACGTTCGATGAGTTTCGATCAG  
 GaAcuTFS9b GGAGCTGTGGACATCGGGCAGCTGAGCAGCGAGGTCATCTCCAACATGGGCAGCTTTCGACGTTCGATGAGTTTCGATCAG  
 SaSalTFS2 CGGGACGTGGATATCGGGCAGCTGAGCAGCGACGTCATCTCCAACATCGAGGCTTTCGATGTCAATGAGTTTCGACCAG  
 GaMorS2 GCGCGGTGGACATCGGGCAGCTGAGCAGCGACGTCATCTCCAACATGGGCAGCTTTCGACGTGGACGAGTTTCGACCAG  
 AsMexTFS9b AGGGACGTGGACATTGGCGAGCTGAGCAGCGACGTCATCTCCAACATCGAGACCTTCGACGTCAACGAGTTTCGACCAG  
 ClGarS CGTGATGTGGACATTGGTGAGCTGAGCAGTGACGTCATCTCCAACATGGAGGCTTTCGATGTGAATGAGTTTCGACCAG  
 CyCarHTF13 GCGCGCGTAGACATCGGGCAGCTGAGCAGCGACGTCATCTCCAACATGGAGCCATTCGACGTCAACGAGTTTCGACCAG  
 ClGarS1 CGCGATGTGGACCTGGGGGAAGTGGAGCAGTGACGTCATCTCGACATGGAGAGCTTTCGATGTGGCCGAGTTTCGACCAG  
 DaRerHBTf1 GGTGCGGTGGACATCGGTGAGCTGAGCAGTGATGTTCATCTCCAACATAGAGGCTTTCGATGTTCGATGAGTTTCGACCAG

1015

HoSapSSDR3 TACCTGCCGCCAACCGGCCACCCGGGGGTGCCGCCACG-----CACGGC-----CAGGTCACCTACACG  
 MuMusSCG1 TACTTGCCACCCAACCGGCCACCCAGGGGTTCCGGCCACC-----CACGGC-----CAGGTCACCTACACT  
 CaLupS1 TACCTGCCGCCAACCGGGCACCCGGGGGTGCCGCCACG-----CACGGC-----CAGGTCACCTACACG  
 GaGalSTF2 TACCTGCCCCCAACCGGCCACCCGGGGGTCCCAGCCACC-----CACGGCCAG-----GTCACCACCTACAGC  
 CoJapSSDRY TACCTGCCCCCAACCGGCCACCCGGGGGTCCCAGCCACC-----CACGGCCAA-----GTCACCACCTACAGT  
 AlMisS1 TACCTCCCACCGAATGGGCACCCCTGGAGTCCCAGCCACT-----CACGGGCAGCCTGGCCAGGTGACCTACACC  
 TrScrHCC TACCTCCCACCCAACCGGTCACCCCTGGAGTCCCAGCCACT-----CATGGGCAACCCGGTCAAGTCACTATAGT  
 LeOliS TACCTCCCACCCAACCGGTCACCCGGGAGTCCCAGCCACC-----CACGGCCAACCCGGTCAAGTCACTACAGC  
 AnPlaSSDRY TACCTCCCACCCAACCGGCCACCCGGGGGTCCCAGCCACC-----CACGGCCAACCCGGCCAGGTCACTACACC  
 LaChaTFS9 TATCTGCCACCCAATGGCCACCCAGGTGTCCCTGTCCACC-----CATGGCCAGAGTGGCCAGGTTACCTACACT  
 XeLaeTFS1 TACCTGCCGCCAACATGGCCACCCAGGGGTTGGCTCCACT-----CACGGCCACCCGGTCAAGTCACTACACA  
 BuBufTFS9 TACCTGCCACCCAATGGCCACCCAGGTGTTGGCTCCACA-----CACGGCCACCCGGTCAAGTCACTACACA  
 XeSilTFS9 TACCTGCCACCCAATGGCCACCCAGGTGTTGGCTCCACA-----CACGGCCACCCGGTCAAGTCACTACACA  
 BuGarS TACCTGCCACCCAACCGGCCACCCGGGAGTGCCTCCACA-----CACGGCCACCCGGTCAAGTCACTACACC  
 RhMarS TACCTGCCACCCAACCGGCCACCCGGGAGTGCCTCCACA-----CACGGCCACCCGGTCAAGTCACTACACC  
 GlRugSAA TACCTGCCGCCAACCGGCCACCCGGGAGTGGCCTCCACG-----CACGGCCACCCGGTCAAGTCACTACACG  
 PlWalS TACCTTCCGCCAACAGCCACCCCTGGTGTGCCACAACC-----CATGGGCAGGCTGGACCAGGTACCTATACC  
 ScCanS1 TACCTCCCACCCAACCGGGCACCCAGGGGCCCCAGTCACCCACACGGGCCATGGACAGAGTGCTCAGGCCACCTACACC  
 DaRerHBTFS TACCTCCCAGCGAACCGGTCACCCAGAACGCACCC-----CACGGCCACCCGGTCAAGTCACTACACC  
 MoAlbHBTf1 TACCTCCCACCCAACCGGGCACCCAGGCACCCAGC-----CACGGCCACCCGGTCAAGTCACTACACC  
 OrNilTFS9a TATCTCCCTCCCAACCGGCCACCCGGGCTCCACC-----AACGCAGCGCCAGTAAGTTACACT  
 GaAcuTFS9a TACCTTCCGCCAACCGGGCACCCGGGCTTAGCG-----GGCGCCGCC-----AACGCAGCGCCAGTAAGTTACACT  
 XiMacTFS9a TACCTCCCGCCAACCGGCCACCCGGGGCCCGCTC-----GGCGCCACTCCGGTCAAGTCACTACAGC  
 TaRubTFS9b TACCTCCCAGCCTAACCGGCATCCCGGCTCTGCT-----AACGCCACCCGGTCAAGTCACTACAGT  
 TeNigTFS9a TACCTCCCACCCAACCGGGCATCCAGGCTCAGCC-----AACGCCACCCAGTCAAGTCACTATAGC  
 OrLatSCC1 TACCTCCCCCAACCGGGCACCCCTGGCGCCGCCCTGGG-----AGCACCCGCCCGTCAAGTCACTACAGC  
 AsMexTFS9a TACCTTCCACCCAACCGGGCATCCGGGCGCTGCC-----TACGTT-----TACGTT  
 GaMorS1 TACCTGCCCCCAACCGGCCACCCGGGCGGCGCT-----GGGGT-----GGGGT  
 MoAlbHBTFS TACCTGCCACCTCACAGCCATGCTGGGGTGACTGGC-----ACAGTTCAGACAGGCTATACC  
 OdBonTFS TACTTGCCACCGCACAGCCACGCTGGGATGACAGGT-----CCAGCCCCAGCTGGCTACACT  
 PoRetS TACCTGCCGCCTCACAGCCACGCTGGGGTGCCTGGT-----GCAGCCCAGGCTGGCTACACA  
 XiMacTFS9b TACCTGCCACCTCACAGCCACGCTGGGGTGTCTGGT-----GCAGCCCAGGCTGGCTACACA  
 EpCois2 TACCTGCCACCTCACAGCCATGCTGGGGTGACCGGA-----GCGGCCAGGCTGGCTACACC  
 TaRubTFS9a TACCTCCCAGCCTCACAGCCACGCTGGGGTGAGCGGC-----GCCCCAGGCTGGCTACACC  
 TeNigTFS9b TACCTCCCTCCTCACAGCCACGCGGGGTGAGCGGC-----GTCCCGCAGGCTGGCTACACC  
 OrNilTFS9b TACCTGCCACCTCACAGCCATGCTGGGGTGAATGGC-----GCAGCGCAGGCTGGCTACAGC  
 CiMonTFS9 TACCTGCCACCTCACAGCCATGCTGGGGTGAATGGT-----GCAGCACAGGTTGGCTATACC  
 CySemSHB TACCTGCCACCTCACAGCCATGCTGGATTGCCAGT-----GGAGCCCAGGCTGGCTACACC  
 OrLatSCC TACCTGCCCCCTCACAGCCACGCTGGGATGACCGGC-----ACAGCCCAGGCTACTTCC  
 GaAcuTFS9b TACCTGCCACCTCACAGCCACATTGGAGTGACNGG-----AGCAGCTCAGGCGCTACGCC

SaSalTFS2 TACCTGCCACCCACGGGCACCCCGGCATGCCTGGCGTC-----AACGGCGCCAGACGGGGCTACACG  
GaMorS2 TACCTGCCGCCCCACAGCCACGCCCACGCCCAC-----CTGACGGCCGGCGGCTACACG  
AsMexTFS9b TACCTGCCGCCGCACGGTCATCCGGGGCTTCCC-----GCCAAGCTCAAGCCTACTCA  
ClGarS TACTTGCCGACGCAC-----GGGGCTCAGGTCTACTCTCTCC  
CyCarHTF13 TACCTGCCCCCTCGCGACACCCGGGGGTGAGC-----GGCGGCATGCAGGGCTATCCC  
ClGarS1 TACCTGCCACCTAACGGGCACCCCGGGCACGGA-----  
DaRerHBTf1 TACCTGCCTCCGCACGGGGCCCCGGGGCCGGCC-----GGTGCAGGGTTCTCC

1093

HoSapSSDR3 GGCAGCTACGGCATCAGC-----AGCACCGCGGCCACCCCGGCGAGC---GCGGGCCACGTGTGGATGTCCAAG---  
MuMusSCG1 GGCAGTTACGGCATCAGC-----AGCACCGCACCCACCCCTGCGACC---GCGGGCCACGTGTGGATGTCCAAG---  
CaLupS1 GGCAGCTACGGCATCAGC-----AGCACCGCGGCCACCCCGGCGGGC---GCGGGCCACGTGTGGATGTCCAAG---  
GaGalSTF2 GGTACCTACGGCATCAGC-----AGCTCGGCCAGCTCTCCGGCGGGC---GCCGGGCACGCCTGGATGGCCAAAG---  
CoJapSSDRY GGTACCTACGGCATCAGC-----AGCTCGGCCAGCTCTCCGGCAGGC---GCAGGGCATGCCTGGATGGCCGAA---  
AlMisS1 GGCAGCTACGGGATCAGC-----AGCACTGCCGCCACCCCGACCGGG---GCCGGGCACGTGTGGATGTCCAAG---  
TrScrHCC GGCAGCTACGGAATCAGT-----AGCACGTACGCCACTCAAGCTGGA---GCCGGGCCCGTTTGGATGTCCAAG---  
LeOliS GGCAGCTATGGGATCAGC-----AGCACGCCTGCCACTCAAGCTGGA---GCCGGGCACGTGTGGATGTCCAAG---  
AnPlaSSDRY GGCAGCTACGGCATCAGC-----AGCTCGGCCGGCTCACC GGCCGGT---GCCGGGCACGTGTGGATGTCCAAG---  
LaChaTFS9 GGCAGTTATGGCATCAGC-----AGTACAGCGGTCACTCAGGCAGGT---GGTAGCCATCCTTGGATGTCCAAG---  
XeLaeTFS1 GGCAGTTATGGCATCAGC-----AGCACCCCTAGTGCAACCACAGGT---GCTGGCCCTGCCTGGATGTCTAAA---  
BuBufTFSP GGCAGTTATGGCATCAAC-----AGCACCCCCAGCGCTACTCCGGGT---GCTGGCCCTGCCTGGATGTCTAAA---  
XeSilTFS9 GGCAGTTATGGCATCAAC-----AGCACCCCCAGCGCTACTCCGGGT---GCTGGCCCTGCCTGGATGTCTAAA---  
BuGarS GGCAGTTACGGCATCACC-----AATACAAACAGTGCTACCACGGGCGCCGCCGGGCACACATGGATGTCCAAA---  
RhMarS GGCAGTTACGGCATCACC-----AATACAAATAGTGCCACCACCGGC---GCCGGGCACACATGGATGTCCAAA---  
GlRugSAA GGCAGCTACGGCATCAGC-----AGCGCCCGCGGGCTCCTGCCGGG---GCTGGGCACGCCTGGATGCCCAAAG---  
PlWals AACAGCTACGGGCTGGC-----AACACAGCAGCTCCCCAACCTGGGGCTCCAGCCCATGCCTGGCTGGCCAAA---  
ScCanS1 GGCAGCTATGGGATTTGC-----AGCACTTCAGTCACCCAG-----GCCGCCACCCCTTGGTTGTCCAAG---  
DaRerHBTfS GGAGGATACGCC-----GCCCTGGATGACCAAAA---  
MoAlbHBTf1 GGCAGCTACAGCATCAGCAGC---AGTGACCCGTCAGTCCACAGCCAGGAGGTGCCACAGCCTGGATGGCTAAG---  
OrNilTFS9a GGCAGCTACAGCATCAGCAGCGGGCGGCTCCAGTCAGCCCCAGTCAGGAGGC-----GCCTGGATGGCTAAA---  
GaAcuTFS9a -----GCG-----GCTTGGCTGGCGAAA---  
XiMacTFS9a GGCAGCTACAGCATAAGCGGC---GGGGCGCCGCTCAGCCCGCAGCCG-----GCCTGGATGTCTAAA---  
TaRubTFS9b GGCAGTTACAGCATCAGTAGC---AGCGGCCCTGTGAGCCACAGACGGGAGGCGTGGCAGCCTGGCTGACTAAACCC  
TeNigTFS9a GGCAGCTACAGCATCAGCAGC---AGTGCCCCGTCAGCCACAGGCGGGAGGCGTGGCAGCCTGGCTGACCAAACCC  
OrLatSCC1 GGCAACTACAGCATCAGCGGC---GCCCCGCTCTGAGCCCGCAGGCAGGCGGGGGCCGGCCTGGATGGCTAAG---  
AsMexTFS9a GGCAGCTACAGCCTGGCCGGTCCCGGCACAGTTGGTCAGGCGGCGGCAGGAGGT-----GTCTGGATGAGCAAAG---  
GaMorS1 GCCGCCTTCTGCCCGTCC-----GCCTGGATGGGCAAG---  
MoAlbHBTfS AACAGCTAC---AACATCAGCAGCCCTTCAGTCTGTCAGGCAGCCAATGCTGGAGCCACACCTGGGTGTCCAAG---  
OdBonTfS AACAGCTAC---GGTATCAACAGCTCCTCAGTCAGCCAGGCTACCAATGTTGGAGCCACGCCTGGATGTCCAAG---  
PoRetS GGTAGCTAC---GGTATTAGCACCCGCTCAGTCGGTCAGGGAGCCGGTGTGGGAGCTCATGCTTGGATGTCCAAG---  
XiMacTFS9b GGCAGCTAC---GGTATTAGCACCTCCTCAGTCGGTCAGGGAGCCGGTGTGGGAGCTCATGCTTGGATGTCCAAG---  
EpCois2 AGCAGCTAC---GGCATCAGCAGCTCCTCAGTCAGCCAGGCGGCAATGTCGGAGCCACACCTGGATGTCCAAA---  
TaRubTFS9a GGCAGTTAC---GGCATCAGCAGCTCCTCCGTGAGCCAGGCGGCGGCGTGGGGGCCAACGCTGGATGTCCAAG---  
TeNigTFS9b GGCAGTTAC---GGCATCAGCGGCTCCTCCGTTAGCCAGACGGGCAGCGTTGGGACCCAAAGCCTGGATGTCCAAG---  
OrNilTFS9b AGCGGCTAC---CCTATCAACAGCTCCTCTGTGCGCCAGCCAGCCAGTGTGGAGCCACGCCTGGATGTCCAAG---  
CiMonTFS9 AGCAGCTAT---CCCATCAACAGTTTCTCAGTCGGCCAGCCACCCAGTGTGGAGCCACGCCTGGATGTCCAAA---  
CySemSHB GGCAGCTAT---GGCATGGGCAGCTCCTCTTAGGCCAGGCAGCTAATGTTGGGGTCCATGCTTGGATGTCCAAG---  
OrLatSCC AACAACTAC---GTTATCAACAGCTCTGCCGTTGGCCAGACAGCCAATGTTGGAGCCCATGCCTGGATGCCAAA---  
GaAcuTFS9b AGCGGCTAT---GGCATCGGCGGCTCCTCAGTCGGCCACGCGGCAATGTCGGGGCCACGCCTGGATGTCCAAG---  
SaSalTFS2 AGCAGCTACCGCGGCATCAGCGCCAGCTCCATTGGCCAG---GTGGGTGCTGGAGGACATGGCTGGATGTCCAAG---  
GaMorS2 GGGAGCTAC-----GGCCAGTCGGCTAGCCCCGGGCGCCACGCCTGGATGTCTGAAG---  
AsMexTFS9b GCCAGCTAC---GGTCTGTCCCTCTCAGCT-----GGTGGATGTCCAAG---  
ClGarS TCTGGGTAT-----GGCATGGGCCAGACAGCAGGCACCAGCGGGCATGGCTGGATGGGCAAAA---  
CyCarHTF13 GCCGGGTAC-----GGTGGCACCTGGATGTCCAAA---  
ClGarS1 -----TGGATGAGCTCAGCGCCAGCGGTTGGATGACCAAAG---  
DaRerHBTf1 AGCGGGTAC-----GGCAGCGCAGCCTGGATGCACAAA---

1171

HoSapSSDR3 -----CAGCAGGCG-----CCGCCGCCACCCCGCAGCAG  
MuMusSCG1 -----CAGCAGGCG-----CCGCCCTCCTCCGCGCAGCAG  
CaLupS1 -----CAGCAGGCGCCGCGCCGCGCCGCGCCGCGCCGCGCCGCGCAGCAG  
GaGalSTF2 -----CAG-----CAGCCGACGCCCCACAGCCC  
CoJapSSDRY -----CAG-----CAGCCACAGCCCCACAACCC  
AlMisS1 -----CAGCCGACGCCGCGCAGCAGCCGACGCGCCGCGCAGCCG  
TrScrHCC -----CAACCG---CCGACGCCCCAACAGCAGCCG-----CCG  
LeOliS -----CAACAGCACAGCACAGCACGCGCCGCGCC-----AGG  
AnPlaSSDRY -----CAG-----CAGCCTCAACCCCAACCACAG  
LaChaTFS9 -----CAG-----CAGCAGCAG-----

|             |                                                                                 |
|-------------|---------------------------------------------------------------------------------|
| XeLaeTFS1   | -----CAACAG-----CAACAG-----                                                     |
| BuBufTFSP   | -----CAACAA-----CAGCAGCAGCAGCAACAACCA                                           |
| XeSilTFS9   | -----CAACAA-----CAGCAGCAGCAGCAACAACCA                                           |
| BuGarS      | -----CAGCAGCAGCCGCAGCAGCCG                                                      |
| RhMarS      | -----CAGCAG-----CAGCAGCAGCCGCCAGCCG                                             |
| GlRugSAA    | -----CAGCCC-----CAACAGCAACCTCAACAGCCC                                           |
| PlWals      | -----CAG-----CAACAGCAG-----                                                     |
| ScCanS1     | -----CAG-----                                                                   |
| DaRerHBTFS  | -----CCCCAAAACGGCAGCCCTCAA-----                                                 |
| MoAlbHBTFS1 | ACTCAG-----AACCACAGGGA-----CAG-----                                             |
| OrNilTFS9a  | AGCCCG-----AACCAGCAGGGACAACAGCAGCAG-----                                        |
| GaAcuTFS9a  | AGCCAA-----AACCAGCAGGGA-----CAGCAG-----                                         |
| XiMacTFS9a  | AGCCAG-----AACCAGCAGGGA-----CAGCAGCAG-----                                      |
| TaRubTFS9b  | AACCAG-----AACCAGCAGGGA-----                                                    |
| TeNigTFS9a  | AACCAG-----AACCAGCAGGACAGCAGCAGCAG-----                                         |
| OrLatSCC1   | GCCAC-----AGTCAGCAG-----CAG-----                                                |
| AsMexTFS9a  | ACCCAGAGTGGGAACCCTCAGGGTGGGCCACAGCCGTCAAATCAGCAGCAGCAACAGCAGCAG-----            |
| GaMorS1     | -----GGCCAGAGCCTGCAGCAGCAG-----                                                 |
| MoAlbHBTFS  | -----CAGCAGCAGCAGCAGCAGCAG-----                                                 |
| OdBonTFS    | -----CAGCAGCAACAG-----                                                          |
| PoRetS      | -----CAGCAGCAACAGCAG-----                                                       |
| XiMacTFS9b  | -----CAGCAGCAG-----                                                             |
| EpCoiS2     | -----CAGCAGCAGCAG-----                                                          |
| TaRubTFS9a  | -----CAGCAGCAGCAGCAGCAGCAGCAG-----                                              |
| TeNigTFS9b  | -----CAGCAGCAGCAGCAGCAGCAGCAGCAG-----                                           |
| OrNilTFS9b  | -----CAGCAGCAGCAGCAGCAGCAGCAACAG-----                                           |
| CiMonTFS9   | -----CAGCAACAGCAGCAACAGCAGCAC-----                                              |
| CySemSHB    | -----CAGCAGCAGCAGCAGCAACAGCAGCAGCAGCAG-----                                     |
| OrLatSCC    | -----CAG-----                                                                   |
| GaAcuTFS9b  | -----CAGCAGCAGCAGCAGCAG-----                                                    |
| SaSalTFS2   | -----CAGCAGCAG-----                                                             |
| GaMorS2     | -----CAGCATCAGCAGCAGCAGCAGCAGCAGCAGCAGCAGCAGCAGCAGCAGCAG-----                   |
| AsMexTFS9b  | -----CAGCATCAGCAACAACATCAGCAGCAGCAGCCACAGCAGCCGCCACAGTCGCAATCGCAGCCACAGCAG----- |
| ClGarS      | -----CAACAGCCACAG-----                                                          |
| CyCarHTF13  | -----                                                                           |
| ClGarS1     | -----                                                                           |
| DaRerHBTFS1 | -----                                                                           |

1249

|             |                                                                            |
|-------------|----------------------------------------------------------------------------|
| HoSapSSDR3  | CCCCCACAGGCCCGCCG---GCCCGCAGGCGCCCCCGCAGCCCGAGGCGGCCCCACAGCAGCCGGCGGCCACCC |
| MuMusSCG1   | CCTCCGAGGCCCGCAA---GCCCGCAGGCGCCTCCGAG---CAGCAAGCACCCCGCAGCAGCCGCGAGGCA--- |
| CaLupS1     | TCCCCGAGGCGCCCCCGCAGCCCCCGCAGGCGCCCCCGCAGGCGGCCCGCAGCCGCAGCCCGCGCCC        |
| GaGalSTF2   | CCAGCACAG-----CCC-----                                                     |
| CoJapSSDRY  | CCAGCACAG-----CCC-----                                                     |
| AlMisS1     | CCGCCGAGGCTCAGCCC-----                                                     |
| TrScrHCC    | CCGCCCCAGGCCCGCCC-----                                                     |
| LeOliS      | CCAGCGCAG-----                                                             |
| AnPlaSSDRY  | CCCCCCCAG---CAGCCC-----                                                    |
| LaChaTFS9   | -----                                                                      |
| XeLaeTFS1   | CAGCCTCAA-----                                                             |
| BuBufTFSP   | CAGCCTCCC-----                                                             |
| XeSilTFS9   | CAGCCTCCC-----                                                             |
| BuGarS      | CCCCAGCAG-----                                                             |
| RhMarS      | TCCCAGCAG-----                                                             |
| GlRugSAA    | CAGCAGCAG-----                                                             |
| PlWals      | -----                                                                      |
| ScCanS1     | -----                                                                      |
| DaRerHBTFS  | -----AGC-----                                                              |
| MoAlbHBTFS1 | -----CAG-----                                                              |
| OrNilTFS9a  | -----CAG-----                                                              |
| GaAcuTFS9a  | -----CAG-----                                                              |
| XiMacTFS9a  | -----CAG-----                                                              |
| TaRubTFS9b  | -----CAG-----                                                              |
| TeNigTFS9a  | -----CAG-----                                                              |
| OrLatSCC1   | -----CAG-----                                                              |
| AsMexTFS9a  | -----CAA-----                                                              |
| GaMorS1     | -----AGG-----                                                              |
| MoAlbHBTFS  | -----CAG-----                                                              |

OdBonTFS -----CAG-----  
 PoRetS -----CAG-----  
 XiMacTFS9b -----CAG-----  
 EpCoiS2 -----CAG-----  
 TaRubTFS9a -----CAG-----  
 TeNigTFS9b -----CAG-----  
 OrNilTFS9b -----CAG-----  
 CiMonTFS9 -----  
 CySemSHB -----CAG-----  
 OrLatSCC -----CAG-----  
 GaAcuTFS9b -----CAG-----  
 SaSalTFS2 -----CAG-----  
 GaMorS2 -----CAG-----  
 AsMexTFS9b CCACCACAG-----  
 ClGarS -----CAA-----  
 CyCarHTF13 -----CAG-----  
 ClGarS1 -----  
 DaRerHBTF1 -----

1327

HoSapSSDR3 CCGCAGCAGCCACAGGGCGCACACGCTGACCACGCTG-----AGCAGCGAGCCGGGCCAGTCCCAG  
 MuMusSCG1 CCCCAGCAGCAGCAGGCACACACGCTCACCACGCTG-----AGCAGCGAGCCAGGCCAGTCCCAG  
 CaLupS1 CCGCAGCCCGCAGGGCGCGCACACGCTGACCCCGCTG-----AGCAGCGAGCCGGGCCAGGCCAG  
 GaGalSTF2 -----CCGGCACAGCACACACTGCCAAGCACT-----GAGCGTGAGCAGGGTCCGGGCACAG  
 CoJapSSDRY -----CCGGCGCAGCACACACTGCCAGCACTG-----AGCGGTGAGCAGGGCCCGACACAA  
 AlMisS1 -----CAAGCGGCGCACACGATGACCCCCCTG-----AGTGGCGAGCAGGGGCAGTCCCAG  
 TrScrHCC -----CAGCCGCCGCATACCATGACCACCCTG-----AGCAGCGAACAGGGCCAGTCCCAG  
 LeOliS -----CATGCGATGACCACCCTG-----AGCAGCGAACAGGGCCAGTCCCAG  
 AnPlaSSDRY -----CCGGCGCAGCACGGGTTGCCGGCGCTG-----AGCAGCGAGCAGGGCCAGGCGCAG  
 LaChaTFS9 -----CACTCAATAACCACCCTG-----AGCAGCGAACAGGGCAGGCCAG  
 XeLaeTFS1 -----CAACATTCACTGTCAACCCTA-----AACAGCGAGCAAAGCCAGTCCCAG  
 BuBufTFSP -----CAACACTCACTGTCAACCATA-----AACAGCGAGCAAAGCCAGTCCCAG  
 XeSilTFS9 -----CAACACTCACTGTCAACCATA-----AACAGCGAGCAAAGCCAGTCCCAG  
 BuGarS -----CCGCACACATTGTGCGACTCTG-----AGCAGCGAGCAGAGCCAGTCCCAG  
 RhMarS -----CCGCACGCATTGTCCACTCTG-----AGCGGCAGCAGAGCCAGTCCCAG  
 GlRugSAA -----CAGCACGGTTTACCGACTCTG-----AGCAACGAGCAGAGCCAAAGCCAA  
 PlWals -----CACACGTTGACCACACTG-----GGCAGCGAGCAGAGCCAGGGCGCAG  
 ScCanS1 -----CATTGATGACGGGCCCTC-----ACCAGCGCAGGGACAG---CAG  
 DaRerHBTF5 -----AGCCAGCTGACCCCGCTG-----AACCCGCGAGAACCAGCCAGCAG  
 MoAlbHBTF1 -----CAGACTCTGACCACCCTG-----GGGAGCAGTGGTGGCTCAGAGGCAGCTTCTGCCAG  
 OrNilTFS9a -----CACACCCTGACCACCCTG-----GGGAGCAGCGGGGCTTCAGACGCCGCTCAGACCCAG  
 GaAcuTFS9a -----CATACTCTGACCCCACTG-----GGGGGAGGGGGCGCC-----GAG  
 XiMacTFS9a -----ATCACCCCTCACCACGTTG-----GGCGGCGGCGGCGGAGGCTCGGACGCTGCCAGGGCGCAG  
 TaRubTFS9b -----CACACCCTGACCACCCTG-----GTGGGCAGCAGC-----ACAGAAGCCAG  
 TeNigTFS9a -----CACACCCTGACCACCCTG-----GTGGGCAGCGGC-----TCAGAAGCCAG  
 OrLatSCC1 -----CACAGCCTGACCCCCCTG-----GGGACCAGCGGGGTTTCAGAGGCCGCC-----CTG  
 AsMexTFS9a -----CATTCCCTGACCCAGCTG-----GGTACTGGCAATGGTGGGGATCAGGGTCCAGCAGAGG  
 GaMorS1 -----  
 MoAlbHBTF5 -----CACTCTCTGACCACCCTG-----GGTGGAGGAGGAGAGCAAGGCCAGCAGGGTCAACAG---  
 OdBonTFS -----CATTCTTTGACCACCCTG-----GGTGGAGCAGGAGAGCAAGGCCAGCAGGGTCCAGCAG---  
 PoRetS -----CATACTCTGACCACCCTT-----GGTGGAGCAGGAGAGCAAGGTCAACAGGGCCAGCAG---  
 XiMacTFS9b -----CATACTCTGACCACCCTT-----GGTGGAGCAGGAGAGCAAGGTCAACAGGGCCAGCAG---  
 EpCoiS2 -----CACTCTCTGACCACCCTG-----GGTGGAGGAGGAGAGCCAGTCCAGCAGGGTCAACAG---  
 TaRubTFS9a -----CACTCCTTGACTGCCCTG-----AGTGGGGGAGGAGAGCAAAGCCAGCAGGGTCCAGCAG---  
 TeNigTFS9b -----CACCCCTGACCACCCTG-----GGTGGGGGAGGAGAGCAAAGCCAGCAGGGTCCAGCAG---  
 OrNilTFS9b -----CTCTCTCTGACCACCCTG-----GGTGGAGGAGGAGAGCAAAGCCAGCAGGGTCAACAG---  
 CiMonTFS9 -----TCTCTGACCACCCTG-----GGTGGAGGAGGAGAGCAAGGCCAACAGGGTCAACAG---  
 CySemSHB -----CACTCTCTGACCACACTG-----GGCGGAGGAGGTGAGCAAGGTTCAGCAAGGTCAACAA---  
 OrLatSCC -----CATTCTTTGGCCACCCTC-----GGTGGGGGTGGAGATCAAAGCCAACAGGGTCAACAG---  
 GaAcuTFS9b -----CACTCTTTGACCACCCTG-----GGCGGAGGAGGAGAGCAAGGCCAGCAGGGTCAACAG---  
 SaSalTFS2 -----CACTCCATCTCCGCCCTGAGTGGAGGTGGAGGTATTGGGGGAGAGCAAGGCCAGAGCCAG  
 GaMorS2 -----CACTCTCTGACCACGCTG-----GGCGGAGACGGCGAGCAG-----  
 AsMexTFS9b -----CACTCCCTGACCACGCTGACCCCGGCAGACCAGGCCAGTCCCAACAA-----  
 ClGarS -----CACTCTCTGACCACACTT-----GGCACAGCTGGCGAGCAGGGGCAGACCCAACAG-----  
 CyCarHTF13 -----CACTCGATGGCCAGC-----GGTGGCGAGCAGAGCCAAGGCCAGCAG-----  
 ClGarS1 -----AGCCCCAGTTCCAGCCCTCAGGTGGGTGCTACCAGCCCTGGTGAGGATCAGAGCCAG  
 DaRerHBTF1 -----CCACTC-----GCGAGCAGCTCCATGGCTAATGCCGGCGAGCAGCACCAG

1405

HoSapSSDR3 ---CGA---ACGCACATCAAGACGGAGCAGCTGAGCCCCAGCCACTACAGC-----  
 MuMusSCG1 ---CGA---ACGCACATCAAGACGGAGCAGCTGAGCCCCAGCCACTACAGC-----  
 CaLupS1 ---CGA---ACGCACATCAAGACGGAGCAGCTGAGCCCCAGCCACTACAGC-----  
 GaGalSTF2 CAGCGG---CCGCACATCAAAAACAGAGCAGCTGAGCCCCAGCCATAACAGC-----  
 CoJapSSDRY CAGCGG---CCGCACATCAAAAACGGAGCAGCTGAGCCCCAGCCACTACAGC-----  
 AlMisS1 CAGCGG---CCGCACATCAAGACGGAGCAGCTGAGCCCCAGCCATTACAGC-----  
 TrScrHCC CAGAGG---ACACACATCAAGACAGAACAACACTCAGTCCGAGCCATTACAGC-----  
 LeOliS CAGAGG---ACACACATCAAGACAGAGCAGCTCAGTCCCAGCCATTACAGC-----  
 AnPlaSSDRY CAGCGG---ACGCACATCAAGACGGAGCAGCTGAGCCCCAGCCACTACAGC-----  
 LaChaTFS9 CCCAGG---ACACACATCAAGACTGAGCAGCTAAGCCCCAAGTCACTACAGC-----  
 XeLaeTFS1 CAAAGG---ACACACATCAAGACCGGAGCAACTGAGTCCAAGTCATTACAGTGAC-----  
 BuBufTFSP CAAAGG---ACACACATCAAGACTGAACAACACTGAGCCCTAGCCATTACAGTGAC-----  
 XeSilTFS9 CAAAGG---ACACACATCAAGACTGAACAACACTGAGCCCTAGCCATTACAGTGAC-----  
 BuGarS CAGAGG---ACACACATCAAGACCGGAGCAGCTTAGTCCAAGTCATTACAGCGAC-----  
 RhMarS CAGAGG---ACACACATCAAGACTGAGCAGCTTAGTCCAAGTCATTACAGCGAC-----  
 GlRugSAA CAGAGG---ACACACATCAAAAACCGGAGCAGCTCAGCCCCGAGTCACTACAGCGAC-----  
 PlWals CAGAGG---ACACACATCAAGACCGGAACAACACTTAGCCCCACACACTACAGC-----  
 ScCanS1 CAGAGG---ACACACATCAAGACCGGAGCAGTTGAGCCCCAGCCATTACAAT-----  
 DaRerHBTFS CCCCCAAGCAGCATATTTAAAACCGAACAGCTCAGCCCCAGCCATTACAACGAG-----  
 MoAlbHBTf1 CACAGG---ACCCAGATCAAGACAGAGCAACTGAGCCCCAAGTCACTACAGCGAG-----  
 OrNilTFS9a CATAGG---ACCCAGATCAAGACCGGAGCAGCTGAGCCCCAGCCACTACAGCGAG-----  
 GaAcuTFS9a CACCGG---ACCCAGATAAAGACTGAGCAGCTGAGCCCCGAGCCACTACACCGAG-----  
 XiMacTFS9a CACAGG---ACCCAGATCAAGACCGGAGCAGCTGAGCCCCGAGTCACTACAGCGAG-----  
 TaRubTFS9b CACAGG---ACCCAGATCAAGACAGAACAGCTGAGCCCCGAGCCATTACAACGAC-----  
 TeNigTFS9a CACAGG---ACCCAGATCAAGACCGGAACAGCTGAGCCCCGAGCCATTACAACGAT-----  
 OrLatSCC1 CGCAGG---ACCCAGATTAAGACCGGAGCAGCTGAGCCCCAGTCACTACAGCGAG-----  
 AsMexTFS9a ACCCCG---ACACACATCAAGACAGAGCAGCTGAGTCCCAGCCACTACAGTGAG-----  
 GaMorS1 -----ACCCACATCAAGACCGGAGCAGCTGAGCCCCGGGTCACTACTCGGAGCAGCTCAGCCCCGGGCACTACTCT  
 MoAlbHBTFS ---AGAACCGCCAGATCAAGACAGAACAGCTAAGTCCCAGCCACTTACAGCGAA-----  
 OdBonTFS ---AGAACCACCCTGATTAAGACAGAGCAGCTGAGCCCCAAGCCACTACAGCGAG-----  
 PoRetS ---AGAACCACCCAGATCAAGACAGAGCAGCTCAGCCCCGAGCCACTACAGTGAC-----  
 XiMacTFS9b ---AGAACCACCCAGATCAAGACCGGAGCAGCTCAGCCCCGAGCCACTACAGTGAC-----  
 EpCois2 ---AGAACCACCCAGATCAAAAACAGAGCAGCTGAGCCCCAGCCACTACAGCGAG-----  
 TaRubTFS9a ---AGGCCCGCCAGATCAAGACAGAGCAGCTGAGTCCGAGCCACTACAGCGAG-----  
 TeNigTFS9b ---AGGCCCGCCAGATCAAGACCGGAGCAGCTGAGTCCGAGCCACTACAGCGAG-----  
 OrNilTFS9b ---AGAACCACCCAGATTAAGACCGGAGCAGCTGAGCCCCAGCCACTACAGCGAG-----  
 CiMonTFS9 ---AGAACCACCCAGATTAAAAACAGAGCAGCTGAGCCCCAGCCACTACAGCGAG-----  
 CySemSHB ---AGAACCACACAGATCAAGACAGAGCAGCTGAGTCCCAGTCACTACAGTGAG-----  
 OrLatSCC ---AGAACCACCTCAGATCAAGACCGGAGCAGCTGAGCCCCAGCCACTACAGCGAG-----  
 GaAcuTFS9b ---AGAACCACCCAGATCAAGACCGGAGCAGCTGAGCCCCAGCCACTACAGCGAG-----  
 SaSalTFS2 GGGAGAACCCTCACATCAAGACCGGAGCAGCTGAGCCCCAGCCACTACAGTGAG-----  
 GaMorS2 ---AGGACCACCCAGATCAAGACCGGAGCAACTGAGCCCCAGCCACTACCGCGAG-----  
 AsMexTFS9b ---CGCCCCACACAGATCAAGACAGAGCAGCTGAGCCCCAGCCACTACAGCGAC-----  
 ClGarS ---CGGCCAGCACACATCAAGACAGAGCAGCTCAGCCCCAAGCCACTACAGTGAG-----  
 CyCarHTF13 ---CGG---ACGCAGATCAAGACCGGAGCGGCTGAGCCCCAGCCACTACAGCGAG-----  
 ClGarS1 CAGAGAACAACGCACATCAAAAACAGAGCAGCTGAGTCTTAGCCAT-----  
 DaRerHBTf1 CAGAGG---GCGCAGATCAAGACCGGAGCAGCTGAGCCCCGGGCCACTACAGC-----

1483

HoSapSSDR3 -----GAGCAGCAGCAGCACTCG---CCC-----  
 MuMusSCG1 -----GAGCAGCAGCAGCACTCC---CCG-----  
 CaLupS1 -----GAGCAGCAGCAGCACTCG---CCG-----  
 GaGalSTF2 -----GAGCAGCAGCAGCATCCC-----GAGCAGCAGCAGCAGCAG  
 CoJapSSDRY -----GAGCAGCAGCAGCACTCC---CCGCAACAACAGCAGCAGCAGCAG  
 AlMisS1 -----GAGCAGCAGCAGCATTCG---CCG-----  
 TrScrHCC -----GAGCAGCAGCAGCACTCC---CCT-----  
 LeOliS -----GAGCAACAGCAGCACTCC---CCA-----  
 AnPlaSSDRY -----GAGCAGCAGCAGCACTCG---CCG-----  
 LaChaTFS9 -----GAG---CAGCAGCATTCG---CCC-----  
 XeLaeTFS1 -----CAACAGCAACAGCATTC---CCC-----  
 BuBufTFSP -----CAGCAGCAACAGCACTCC---CCC-----  
 XeSilTFS9 -----CAGCAGCAACAGCACTCC---CCC-----  
 BuGarS -----CAGCAGCAGCAACTCT---CCG-----  
 RhMarS -----CAGCAGCAGCAACTCC---CCA-----  
 GlRugSAA -----CAGCAGCAACAGCATTC---CCG-----  
 PlWals -----GAGCAGCAGCAGCACTCC---CCC-----  
 ScCanS1 -----GAGCAGCAGCACTCA---CCC-----

```
DaRerHBTFS -----CAG-----CAGGGCTCT--CCG-----
MoAlbHBTf1 -----CAG-----CAGGGCTCC--CCG-----
OrNilTFS9a -----CAG-----CAGGGCTCC--CCG-----
GaAcuTFS9a -----CAG-----CAGGGTTCC--CCG-----
XiMacTFS9a -----CAG-----CAGAGTTCC--CCG-----
TaRubTFS9b -----CAG-----CAGAGCTCG--CCG-----
TeNigTFS9a -----CAG-----CAGGGCTCG--CCG-----
OrLatSCC1 -----CAG-----CAGGGCTCC--CCC-----
AsMexTFS9a -----CAG-----CAGGGCTCG--CCG-----
GaMorS1 GAGCAGCAGCAGCAGCAGCAGCAGCAGCAGCAGCAGCAGCAG-----CAGAGCTCC--CCC-----
MoAlbHBTFS -----CAA-----CAGGGCTCC--CCC-----
OdBonTFS -----CAG-----CAGGGCTCC--CCA-----
PoRetS -----CAA-----CAGGGATCC--CCG-----
XiMacTFS9b -----CAA-----CAGGGATCC--CCG-----
EpCois2 -----CAG-----CAGGGCTCC--CCA-----
TaRubTFS9a -----CAG-----CAGGGCTCC--CCC-----
TeNigTFS9b -----CAG-----CAGAGCTCC--CCG-----
OrNilTFS9b -----CAG-----CAGGGCTCC--CCA-----
CiMonTFS9 -----CAG-----CAGGGCTCC--CCA-----
CySemSHB -----CAG-----CAGGGCTCT--CCT-----
OrLatSCC -----CAG-----CAAAGCTCC--CCA-----
GaAcuTFS9b -----CAG-----CAGGGCTCC--CCG-----
SaSalTFS2 -----CAG-----CAGAGCTCCCCTCCC-----
GaMorS2 -----CAG-----CAGGGCTCGCCTCCG-----
AsMexTFS9b -----CAAGGC--CAGGGTTCCT--CCT-----
ClGarS -----CAGAGC--CAGGGCTCA--CCC-----
CyCarHTF13 -----CAGCAGCGGCAGGGCTCT--CCG-----
ClGarS1 -----
DaRerHBTf1 -----CAGCAGCCG--CCG-----
```

1561

```
HoSapSSDR3 ---CAACAGATCGCC---TACAGCCCCTTCAACCTCCCACACTACAGCCCCTCC-----
MuMusSCG1 ---CAACAGATCTCC---TACAGCCCCTTCAACCTTCCCTCACTACAGCCCCTCC-----
CaLupS1 ---CAGCAGATCGCC---TACAGCCCCTTCAAGCTCCCAGCAGTACAGCCCGTCC-----
GaGalSTF2 CAACAGCAGCTGGGC---TACGGCTCCTTCAACCTGCAGCACTACGGCTTCTCG-----
CoJapSSDRY CAACAGCAGCTGGGC---TACGGCTCCTTCAACCTGCAGCACTACGGCTCCTCG-----
AlMisS1 ---CAGCAGATCAAC---TACAGCTCCTTCAACCTCCAGCACTACAGTTCATCC-----
TrScrHCC ---CAGCAGCTCAAT---TATAGCTCCTTCAACCCCCAGCACTACAGTTCCTCC-----
LeOliS ---CAGCAGCTCAAT---TATAGCTCCTTCAACCTTCCAGCACTACAGTTCCTCC-----
AnPlaSSDRY ---CAGCAGCTCAAC---TACAGCTCCTTCAACCTGCAGCACTACGGCTCCTCC-----
LaChaTFS9 ---CAGCACATCAAC---TACGCTCCTTCAACCTTCAACTACAGCTCCTCT-----
XeLaeTFS1 ---CAGCAGCTGAAC---TACAGCTCCTTCAACCTGCAGCATTACAGCTCTTCA-----
BuBufTFSP ---CAGCAGCTGAAC---TACAGCTCCTTCAACCTGCAGCATTACAGCTCTTCC-----
XeSilTFS9 ---CAGCAGCTGAAC---TACAGCTCCTTCAACCTGCAGCATTACAGCTCTTCC-----
BuGarS ---CAGCAGCTCAGC---TACAGCTCCTTCAACCTCAACCATTACGGCTCTTCC-----
RhMarS ---CAGCAGCTCACC---TACAGCTCCTTCAACCTCAACCATTACGGCTCTTCC-----
GlRugSAA ---CAGCAGCTCAAC---TACACCTCCTTCAACCTCCAGCATTACGGGTCCACC-----
PlWals ---CAGCAGCTGAGC---TACAGCCCCTTCAACCTGCAGCACTACAACCTTACC-----
ScCanS1 ---CAGCAGCTCAAC---TACGGCTCCTTCAATATGCAACTACAGTTCATCT-----
DaRerHBTFS ---CAGCACATCAGC---TACGGTTTCCTTCAACCTTCCAGCATCTCCAGCATTACAGC-----
MoAlbHBTf1 ---CAGCACGTGACC---TACAGCCCCTTCAACCTGCAGCACTACAGTCCCCTTCC-----
OrNilTFS9a ---CAGCACGTGAGC---TACAGCCCCTTCAACCTGCAGCACTACAGC---CCCTCC-----
GaAcuTFS9a ---CAACACGTGCTCCTACAACAGCCCCTTCAACCTGCAGCACTACAGCCCCCTTCC-----
XiMacTFS9a ---CAGCACGTGACC---TACAGCCCCTTCAACCTTCCAGCACTACAGCCCCCTGTC-----
TaRubTFS9b ---CAGCACGTGACC---TACAGCCCCTTCAATCTGCAGCACTACAGCCCCCTTCC-----
TeNigTFS9a ---CAGCACATCACC---TACAGCCCCTTCAATCTGCAGCACTACAGCCCCCTGTC-----
OrLatSCC1 ---CAGAACGCCCC---TACAGCCCCTTCAACCTGCAGCACTACAGCCCCCTTCC-----
AsMexTFS9a ---CAACACGTGACC---TACGGTTTCCTTCAACCTCCAGCACTACACC-----GCC-----
GaMorS1 ---CAGCACCTGTCC---TACGGCTCCTTCAACCTGCAGCACTACAGCAGCTCCTCCGGGGGTCCGTCAACGCCCC-----
MoAlbHBTFS ---CAGCATGTGACC---TATGGGTCTTCAACCTGCAGCACTACAGCACCTCTCT-----
OdBonTFS ---CAACATGTGACC---TATGGCTCCTTCAACCTGCAGCACTACAGCGCCTCTCT-----
PoRetS ---CAGCACATCACC---TATGGCTCATTCAACCTTCCAGCACTACAGCCCCCTCTTCT-----
XiMacTFS9b ---CAGCACATCACC---TATGGCTCATTCAACCTTCCAGCACTACAGCCCCCTCTTCT-----
EpCois2 ---CAGCATGCCACC---TATGGGTCTTCAACCTGCAGCACTACAGCACCTCTCT-----
TaRubTFS9a ---CAGCACGTGACA---TACGGGTCTTCAACCTGCAGCACTACAGCACCTCTTCC-----
TeNigTFS9b ---CAGCACGTGACC---TACGGCTCCTTCAACCTGCAGCACTACAGCGCGCCTTCC-----
OrNilTFS9b ---CAGCATGTGACC---TATGGGTCTTCAACCTCCAGCACTACAGCACCAATTCT-----
CiMonTFS9 ---CAGCATGTGACC---TATGGGTCTTCAACCTTCCAGCACTACAGCACCAACTCT-----
```

CySemSHB ---CAGCACATCACC---TACGGGTCCTTCAACCTGCAGCACTACAGCACCTCCTCC-----  
 OrLatSCC ---CAGCACGTGAGC---TACGGGTCCTTCAACCTGCAGCACTACAGCACCTCCTCT---  
 GaAcuTFS9b ---CAGCACGTGACC---TATGGGTCCTTCAACCTGCAGCACTACAGCGCCTCATCC-----  
 SaSalTFS2 ---CAGCATGTCACC---TATGGTTCATTCAACCTGCAGCACTACAGCGCCTCATCC-----  
 GaMorS2 ---CAGCACGTGGCC---TACGGGTCCTTCAACCTGCAGCACTACAGCCCGCCTCC-----  
 AsMexTFS9b ---CAACACGTAGCG---TACGGTTCCTTCAACCTGCAGCACTACAGCACCTCGTCC-----  
 ClGarS ---CAGCATGTGGCA---TATGGTTCCTTCAATCTACAGCATTACACTGCCACCTCC-----  
 CyCarHTF13 ---CAGCATGTGGCC---TACGGGTGCTTCAACCTGCAGCACTACAGCAGCAGCGGC-----  
 ClGarS1 -----TATGGGTCCTTCAACCTGCAGCACTACACCACGTCCACT-----  
 DaRerHBTf1 ---CAGCAG-----CAGTTCTACAGCGCCCC-----

1639

HoSapSSDR3 -----TACCCG---CCCATCACCCGC-----TCA---  
 MuMusSCG1 -----TACCCG---CCCATCACCCGC-----TCG---  
 CaLupS1 -----TACCCG---CCCATCACCCGC-----TCG---  
 GaGalSTF2 -----TACCCC---CCCATCACCCGC-----TCG---  
 CoJapSSDRY -----TACCCC---CCCATCACCCGC-----TCG---  
 AlMisS1 -----TACCCA---ACCATCACCCGC-----TCG---  
 TrScrHCC -----TACCCG---ACCATCACCCGC-----TCG---  
 LeOliS -----TACCCG---ACCATCACCCGC-----TCG---  
 AnPlaSSDRY -----TACCCC---CCCATCACCCGC-----TCC---  
 LaChaTFS9 -----TACCCA---ACCATCACCCGT-----TCC---  
 XeLaeTFS1 -----TACCCA---ACTATCACCCGT-----GCA---  
 BuBufTFS9 -----TACCCA---ACCATTACCCGT-----GCC---  
 XeSilTFS9 -----TACCCA---ACCATTACCCGT-----GCC---  
 BuGarS -----TACCCG---ACCATCACACGC-----TCA---  
 RhMarS -----TACCCG---ACCATCACACGC-----TCA---  
 GlRugSAA -----TACCCA---ACCATCACCCGC-----TCA---  
 PlWals -----TACCCCT---ACTATTACACGT-----GCG---  
 ScCanS1 -----TACCCCT---TCCATTCTCTCGC-----ACC---  
 DaRerHBTfS -----ACTTCATTTCCT---TCCATCACCAGA-----GCG---  
 MoAlbHBTf1 -----TCC---TACCCA---GCCATCTCCAGG-----GCG---  
 OrNilTFS9a -----TCTTCCTACCCG---GCCATCTCCAGG-----GCACAG  
 GaAcuTFS9a -----TCCGCCTACCCGGCCGCCATCTCCAGA-----GCG---  
 XiMacTFS9a -----ACC---TACCCG---GCCATCTCCAGG-----CCG---  
 TaRubTFS9b -----CCT---TACCCC---GGCATCTCCAGA-----GCC---  
 TeNigTFS9a -----CCT---TACCCG---GCCATCTCCAGG-----GCC---  
 OrLatSCC1 -----TCCTCGTACCCG---CCCATCTCCCGA-----GCG---  
 AsMexTFS9a -----TCCTCCTTCCCC---TCCATCAGCCGG-----GCG---  
 GaMorS1 GCCCTCTCCTCCGCCTCCGTGTGCGCCGCCGCGGCTCCTCCGTCTACCCG---ACGACGACGCGG---ACG---  
 MoAlbHBTfS -----TACCCC---TCCATCACAAGA-----GCA---  
 OdBonTFS -----TACCCC---TCCATCACAAGA-----GCA---  
 PoRetS -----TATCCG---TCCATCACAAGA-----GCA---  
 XiMacTFS9b -----TATCCG---TCTATCACAAGA-----GCA---  
 EpCoiS2 -----TACCCC---TCCATCACAAGA-----GCA---  
 TaRubTFS9a -----TACCCC---TCCATGACCAGA-----GCG---  
 TeNigTFS9b -----TACCCC---TCCATG---AGA-----GCG---  
 OrNilTFS9b -----TACCCC---TCCATCACCAGA-----TCA---  
 CiMonTFS9 -----TACCCC---TCCATTACCAGA-----TCA---  
 CySemSHB -----TACCCC---TCCATCACCAGA-----GCA---  
 OrLatSCC -----TACCCC---TCCATCACAAGA-----GCA---  
 GaAcuTFS9b -----TACCCC---TCGATCACGAGA-----GCA---  
 SaSalTFS2 -----TACCCC---TCCATTACCCGC-----GCC---  
 GaMorS2 -----TACCCC---TCCATCACCAGCGGGCCGTCC-----  
 AsMexTFS9b -----TACCCG---TCGGTCGCACGC-----ACC---  
 ClGarS -----TCCACATACCCA---TCCATTGCTCGT-----ACT---  
 CyCarHTF13 -----GGCAGC---AGTGGCAGCGGC-----TCG---  
 ClGarS1 -----TCGTCTCTGCCTTCCCATCATGCATCAGCCGG-----CCT---  
 DaRerHBTf1 -----TACAGC-----CGA-----GCG---

1717

HoSapSSDR3 -----CAGTAC---GACTACACC---GAC---CACCAGAACTCCAGC-----  
 MuMusSCG1 -----CAATAC---GACTACGCT---GAC---CATCAGAACTCCGGC-----  
 CaLupS1 -----CAGTAC---GACTACACT---GAC---CACCAGAACTCCGGC-----  
 GaGalSTF2 -----GAGTAC---GATTACACC---GAG---CACCAGAACTCCGGC-----  
 CoJapSSDRY -----CAGTAT---GATTACACC---GAG---CACCAGAACTCCGGC-----  
 AlMisS1 -----CAGTAC---GACTACACA---GAC---CACCAGAGCTCCAAC-----  
 TrScrHCC -----CAGTAC---GACTACACA---GAC---CACCAGAGTTCCAAC-----



LeOliS -----CAGTAT--GACTACACA--GAC--CACCAGAGTTCCAAC-----  
 AnPlaSSDRY -----CAGTAT--GATTACGGC--GAG--CACCAGAACTCCGGT-----  
 LaChaTFS9 -----CAGTAC--GACTACACA--GAC--CACCAGAGCACC AAC-----  
 XeLaeTFS1 -----CAGTAT--GACTACACC--GAG--CACCAGGGTTCTAGT-----  
 BuBufTFSP -----CAGTAT--GACTACACA--GAG--CACCAAGGCTCCAAC-----  
 XeSilTFS9 -----CAGTAT--GACTACACA--GAG--CACCAAGGCTCCAAC-----  
 BuGarS -----CAGTAC--GACTACACC--GAG--CACCAAGGTTTGAAC-----  
 RhMarS -----CAGTAC--GACTACACC--GAG--CACCAAGGTTTGAAC-----  
 GlRugSAA -----CAGTAC--GACTACACC--GAG--CACCAAGGCTCAAAC-----  
 PlWalS -----CAGTAT--GACTACACC--GAC--CACCAGAGCTCTAAC-----  
 ScCanS1 -----CAGTAC--GAATATTCA--GAC--CACCAGAGTAGCAAT-----  
 DaRerHBTFS -----CAGTAC--GACTATTCC--GACAGCCACCAGGGCGGGC-----AGC-----  
 MoAlbHBTf1 ---CAGCAGTAC--GACTACTCC--GAC--CATCATGGGGGCGAGC--AGC-----ACCACCGCC-----  
 OrNilTFS9a CAGCAGCAGTAC--GACTACCCC--GAC--CACCAGGGGGGAGGCACTGCA-----ACTGCCTCC-----  
 GaAcuTFS9a ---CAGCAGTAC--GACTACTCC--GAC--CACCAAGGGGGCGGG-----GCCGCC-----  
 XiMacTFS9a ---CAGCAGTACTCCGAATACTCT--GAG--CACCAGGGGGGAGGC-----GCC-----  
 TaRubTFS9b ---CAACAGTAC--GACTTCTCT--GAG--CACCAGGCAGCGAACAACAGC-----GGTACGAATGCC-----  
 TeNigTFS9a ---CAACAGTAC--GACTACTCC--GAG--CACCAGGGAGCAAACAACAGTGGCGGGCGCACAAAACACC-----  
 OrLatSCC1 ---CAGCAGTAT--GATTACCCC--GAC--CCCAGGGAGGGGGC-----  
 AsMexTFS9a -----CAGTAC--GACTACGGT--GAC--CAGCAGGGAGCCGCC-----ACCGCCGCC-----  
 GaMorS1 -----CAGTAC--GACTACTCGGTGACCCCCAGCAAGGGGGCGGC-----GCCGCCCC-----  
 MoAlbHBTFS -----CAGTAT--GACTACTCA--GAC--CACCAAGGTGGTGCCAAC-----  
 OdBonTFS -----CAGTAT--GACTATTCA--GAC--CACCAAAGTAGCGCCAAC-----  
 PoRetS -----CAGTGT--GACTATTCA--GAA--CACCAGAGCAGTGCCAAC-----  
 XiMacTFS9b -----CAGTAT--GACTATTCA--GAA--CACCAGAGCAGTGCCAAC-----  
 EpCois2 -----CAGTAT--GACTATTCA--GAC--CACCAAGGTGGTGCCAAC-----  
 TaRubTFS9a -----CAGTAT--GACTATTCA--GAC--CACCAAGGTGGAGCCAAC-----  
 TeNigTFS9b -----CAGTAC--GATTATTCA--GAC--CACCAAGGTGGCGCCAAC-----  
 OrNilTFS9b -----CAATAT--GACTATTCA--GAC--CACCAAAGTGGTGCCAAC-----  
 CiMonTFS9 -----CAGTAT--GACTATTCA--GAC--CACCAAAGTGGTGCCAAC-----  
 CySemSHB -----CAGTAT--GACTATTCA--GAC--CACCAAAGTGGTGCCAAC-----  
 OrLatSCC -----CAGTAT--GACTATTCA--GAC--CACCAAAATAGTGCCAAC-----  
 GaAcuTFS9b -----CAGTAT--GACTATTCA--GAT--CACCAAGGCGGGCGCCAAC-----  
 SaSalTFS2 -----CAGTAT--GACTATTCT--GAT--CACCAGGGCGGGCGCCAAC-----  
 GaMorS2 -----CAGTAC--GACTACTCA--GAA--CACCAGGCGGGCGCAAACCTCCTCCAGCGGCACCGCTAACTCCTCC-----  
 AsMexTFS9b -----CAGTAC--GACTACGCC--GAC--CACCACAGC-----AAC-----  
 ClGarS -----CAGTAT--GATTACAGT--GAC--CACCAGGGCAGTGCTGCC-----  
 CyCarHTF13 -----TACTAC--AACTACACC--GAG--CACCAGAGCCCCCGCCGGC-----  
 ClGarS1 -----CAGTAC--GACTACACC--GAGCAGCCAGCCGGCTCCGCG-----  
 DaRerHBTf1 -----CAGTATACAGAGTACAGC--GAGCAGCACAGC-----

1795

HoSapSSDR3 -----TCCTACTACAGCCAC-----GCGGCAGGCCAGGGC---ACCGGC  
 MuMusSCG1 -----TCCTACTACAGTCAC-----GCAGCCGGCCAGGGC---TCAGGG  
 CaLupS1 -----TCCTACTACAGCCAC-----GCGGCGGGCCAGGGC---TCCAGC  
 GaGalSTF2 -----TCCTACTACAGCCAC-----GCCGCCGGCCAGAGC---GGAAGC  
 CoJapSSDRY -----TCCTACTACAGCCAC-----GCTGCCGGGCAGAGC---GGAGGG  
 AlMisS1 -----TCCTACTACAGCCAC-----GCTGCCGGCCAGAGC---ACCAGC  
 TrScrHCC -----TCCTACTACAGCCAT-----GCGGCCAGCCAGAGC---ACCAGT  
 LeOliS -----TCCTACTACAGCCAT-----GCGGCCAGCCAGAGC---ACCAGC  
 AnPlaSSDRY -----TCCTACTACAGCCAC-----GCCGCCGGGCAGAGC---AGCAGC  
 LaChaTFS9 -----TCTTACTACAGCCAT-----GCGGCAGGCCAGAGT---TCCAAC  
 XeLaeTFS1 -----ACCTATTACAGTCAT-----GCAAGTGGCCAGAAT---TCTGGT  
 BuBufTFSP -----TCTTATTACAGTCAC-----GCAAGCGGTCAGAAT---TCTGGT  
 XeSilTFS9 -----TCTTATTACAGTCAC-----GCAAGCGGTCAGAAT---TCTGGT  
 BuGarS -----ACCTACTATAGCCAT-----GCTGCAGGCCAGAGC---TCCAAC  
 RhMarS -----ACCTACTATAGCCAT-----GCTGCAGGCCAGAGC---TCCAAC  
 GlRugSAA -----TCTTATTACAGCCAC-----GCCGCTGGCCAAAGC---TCAAGC  
 PlWalS -----ACCTACTACAGCCAC-----GCTGCTGGCCAGAGC---TCCAAC  
 ScCanS1 -----TCCTATTACAGCCAT-----GCTGGGGGGCAAACC---ACAGGC  
 DaRerHBTFS -----TCCTATTACAGCCAT-----GCTGGA--GGTCAGAGC---TCCGGG  
 MoAlbHBTf1 -----TCCTACTACAGTCAT-----GCGGGGGCGGGGCAGAGT---CCGGGG  
 OrNilTFS9a -----TCCTACTACAGCCAC-----GCGGGGGCGGGGCAGAGC---TCGGGG  
 GaAcuTFS9a -----GGCTACTACAGCCAC-----GCGGGGGCGGGGCAAGGC---TCAGGG  
 XiMacTFS9a -----TCCTACTACAGCCACCGGGGGGCGGGGCGGGTCAGGGC---TCCGGT  
 TaRubTFS9b -----TCCTACTACAGCCAC-----GCAGGGGGCGGGGCAGGGG---GTCGGG  
 TeNigTFS9a -----TCCTACTACAGCCAC-----GCCGGGGCGGGTCAGGCC---TCGGGG  
 OrLatSCC1 -----TTCTACAGCCCT-----GCAGGGGGCGGGGCAGGGT---TCTGGG

AsMexTFS9a -----TCATACTACAGCCAC-----GCCGCAGGTCAAGGC---TCCGGG  
 GaMorS1 -----TCGTACTACGGCCAG-----GGC  
 MoAlbHBTFS -----TCCTACTACAGCCAT-----GCAGCTGGCCAAGGC---TCCGGC  
 OdBonTFS -----TCCTACTACAGCCAT-----GCAGCTGGCCAAGGC---TCCAGC  
 PoRetS -----TCTTACTACAGCCAT-----GCAGCTGGCCAAGGT---TCCAGC  
 XiMacTFS9b -----TCTTACTACAGCCAT-----GCAGCTGGCCAAGGT---TCCAGC  
 EpCois2 -----TCCTACTACAGCCAC-----GCGGCGGGCCAAAGC---TCCGGC  
 TaRubTFS9a -----TCCTACTACAGCCAC-----GCAGCGGGCCAGGGC---TCTGGG  
 TeNigTFS9b -----TCCTACTACAGCCAC-----ACGACGGGCCAGGGC---TCCGGG  
 OrNilTFS9b -----TCCTACTACAGTCAT-----GCAGGTGGCCAAGGC---TCAAGC  
 CiMonTFS9 -----TCCTACTACAGCCAT-----GCAGCTGGCCAAGGC---TCAAAC  
 CySemSHB -----TCCTACTACAGCCAT-----GCAGCCGGTCAGGGC---TCCGGT  
 OrLatSCC -----TCTTACTACAGCCAT-----GCAGCTGGTCAAGGC---TCCAAC  
 GaAcuTFS9b -----TCCTACTACAGCCAG-----AGC-----CAGGGC---TCCGGC  
 SaSalTFS2 -----TCTTATTATAGCCAT-----GCAGGTGCCCAAGGC---TCAGGG  
 GaMorS2 TCCGCCGCCGCCGCGACCGCCGCCGCGTCCCTCTACTAC-----GGCGGGCAGGGCTCCTCCGGC  
 AsMexTFS9b -----TCGTACTACAGCCAC-----GCCGCCGGCCAAGGC---TCCGGC  
 ClGarS -----TCCTACTACAAC-----CAAGGT---TCAGGG  
 CyCarHTF13 -----TCCTACTACAGCCAG-----  
 ClGarS1 -----TCCTATTACTCGGTG-----GGCCAGGGC-----TCG  
 DaRerHBTf1 -----GCCTACTACAGCCCG-----

1873

HoSapSSDR3 CTCTACTCCACCTTCACCTACATG-----AACCCC-----GCTCAGCGCCCCATGTACACCCCCATC  
 MuMusSCG1 CTCTACTCCACCTTCACCTACATG-----AACCCC-----GCGCAGCGCCCCATGTACACCCCCATC  
 CaLupS1 CTCTACTCCACCTTCACCTACATG-----AACCCC-----GCGCAGAGGCCCATGTACACCCCCATC  
 GaGalSTF2 CTTTACTCCACCTTCACCTACATG-----AACCCC-----ACGCAGCGCCCCATGTACACCCCCAATC  
 CoJapSSDRY CTCTACTCCACCTTCACCTACATG-----AACCCC-----ACGCAGCGTCCATGTACACCCCCATT  
 AlMisS1 CTCTACTCCACCTTCACCTACATG-----AACCCC-----ACCCAGAGGCCGATGTACACCCCCATT  
 TrScrHCC TTCTATTCCACCTTCACGTACATG-----AACCCC-----GCCCAAAGGCCATGTACACGCCCATT  
 LeOliS TTCTATTCCACCTTCACGTACATG-----AAC-----CACCAAAGGCCATGTACACGCCCATT  
 AnPlaSSDRY CTGTACTCCACCTTCACCTACATG-----AACCCC-----ACGCAGCGCCCCATGTACACCCCCATC  
 LaChaTFS9 CTATACTCGACTTTTACCTATATG-----AGCCCC-----ACCCAGCGTCCAATGTACACCCCCATT  
 XeLaeTFS1 CTCTACTCCACCTTTAGCTACATG-----AATCCA-----AGCCAACGCCCTTGTACACCCCTATT  
 BuBufTFSP CTCTACTCCAACCTTTAGCTACATG-----AATCCA-----AGCCAGCGCCCCATGTACACGCCATT  
 XeSilTFS9 CTCTACTCCAACCTTTAGCTACATG-----AATCCA-----AGCCAGCGCCCCATGTACACGCCATT  
 BuGarS CTCTACTCTACCTTCAGCTACATG-----AACCCA-----AGCCAGCGTCCCATGTACACTCCTATC  
 RhMarS CTCTACTCCACCTTCAGCTACATG-----AACCCA-----AGCCAGCGTCCCATGTACACTCCTATC  
 GlRugSAA CTCTACTCAACGTTTCAGCTACATG-----AACCCC-----AGTCAACGCCCATGTACACCCCCATT  
 PlWalS CTCTACTCCACTTTCTCCTACATG-----AACCCC-----ACTCAGCGCCCCATGTATACCCCTATT  
 ScCanS1 CTGTACTCCACCTTTGCCTACACG-----AGTCCA-----GCCCAGCGTCCCATGTACACACCCATT  
 DaRerHBTFS CTGTACTCCACCTTCAGCTACATG-----AGTCCA-----AGCCAGAGGCCCATGTACACACCCATT  
 MoAlbHBTf1 CTATACTCGACTTTTCAGCTACATG-----AGCAGCCCC-----AGCCAGAGGCCCATGTACACACCCATA  
 OrNilTFS9a CTGTACTCAACTTTTCAGCTACATG-----AGCAGCCCC-----ACCCAGAGGCCCATGTACACGCCATA  
 GaAcuTFS9a CTGTACTCGACTTTTCAGCTACATG-----AGTAGCCCC-----AGCCAGAGGCCCATGTACACGCCGATA  
 XiMacTFS9a CTGTACTCGACTTTTCAGCTACATG-----GGCAGCCCC-----AACCAGAGGCCCATGTACACGCCCATC  
 TaRubTFS9b CTGTACTCAACTTTTCAGCTACGTG-----AGCAGCCCC-----AGCCAGAGGCCCATGTACACACCCATC  
 TeNigTFS9a CTGTACTCAACGTTTCAGCTATGTG-----AGCAGCCCC-----AGCCAGAGGCCCATGTACACACCCATC  
 OrLatSCC1 CTGTACTCGACTTTTCAGTTACATG-----AGCAGCCCC-----AGCCAGAGGCCCATGTACACCCCCATC  
 AsMexTFS9a CTCTACTCCACCTTTTCAGCTACGTG-----AGCCCC-----AGCCAGCGGCCCATGTACACCCCCAATC  
 GaMorS1 ATGTTCTCGGCCTTCGGCTACATGCTCCCCGGCAGCCCCCCCCGCGGCCAGAGCCAGAGGCCCATGTACACGCCCATC  
 MoAlbHBTFS CTCCATTCAACCTTCAGCTACATG-----AACCCA-----AACCAGAGGCCCATGTACACCCCCAATC  
 OdBonTFS CTGTACTCCACTTTTCAGTTACATG-----AGCCCC-----AGCCAGAGGCCGATGTACACCCCCAATT  
 PoRetS CTGTACTCCACCTTCAGCTACATG-----AGCCCC-----AGCCAGAGGCCGATGTACACCCCCAATA  
 XiMacTFS9b CTGTACTCCACCTTCAGCTACATG-----AGCCCC-----AGCCAGAGGCCGATGTACACCCCCAATA  
 EpCois2 CTGTACTCCACCTTCAGCTACATG-----AGCCCA-----AGCCAGAGGCCGATGTACACCCCCGATC  
 TaRubTFS9a CTTTACTCCACCTTCAGCTACATG-----AACCCC-----AGCCAGAGGCCCATGTACACCCCCATC  
 TeNigTFS9b CTCTACTCCACCTTCAGCTACATG-----AACCCC-----AGCCAGAGGCCCATGTACACCCCCATT  
 OrNilTFS9b TTGTACTCCACCTTTAGCTACATG-----AGCCCC-----AACCAGAGGCCGATGTACACCCCCAATT  
 CiMonTFS9 CTGTATTCCACCTTTAGCTACATG-----AGCCCC-----AGCCAGAGGCCCATGTATACCCCCGATT  
 CySemSHB CTCTACTCCACCTTCAGCTACATG-----AGTCC-----AGCCAGAGGCCCATGTACACCCCCGATC  
 OrLatSCC ATGTACTCCACCTTCAGCTACATG-----AGCCCC-----AGCCAGAGGCCCATGTATACCCCCATC  
 GaAcuTFS9b CTGTATTCCACT---TCGGCTACA-----TGCCCC-----AGCCAGAGGCCGATGTACACCCCCATC  
 SaSalTFS2 CTCTATTCCCTTCAGCAGCTATATG-----AGCCCC-----AGCCAGAGGCCCATGTATACCCCCATC  
 GaMorS2 CTCTACGCCGGCTTCGGCTACATG-----AACCCC-----AGCCAGAGGCCCATGTACACCCCCATC  
 AsMexTFS9b CTCTACTCCACCTTCAGCTACATG-----AGTCCGGGA-----GCACAGAGGCCCATGTACACCCCCGATC  
 ClGarS CTCTACTCCACATTTAGCTACATG-----AGTTCT-----ACCCAGAGGCCCATGTACACTCCTGTC  
 CyCarHTF13 ---TACCCCGCCTTCAGCTAC-----CAGAGGCCCATGTACACCCCCGATC

ClGarS1 CTTTATTCCACCTTTAACTACATG-----AGTTCT-----AGCCAGAGGCCCATGTACACCCCCATC  
DaRerHBTf1 ---TACCCACATTTCAGCTACAGC-----AGACCCCGTACACCCCTGCA

1951

HoSapSSDR3 GCCGACACCTCTGGGGTCCCTTCCATCCCG---CAGACCCACAGCCCC---CAGCACTGGGAA-----CAACCCGTC  
MuMusSCG1 GCTGACACCTCCGGGGTCCCTTCCATCCCG---CAGACCCACAGCCCC---CAGCACTGGGAA-----CAACCAGTC  
CaLupS1 GCCGACACCTCCGGGGTCCCCTCCATCCCG---CAGACGCACAGCCCC---CAGCACTGGGAA-----CAGCCTGTC  
GaGalSTF2 GCAGACACGTCTGGGGTGCCTTCCATCCCG---CAGACCCACAGCCCCGCAACAGCACTGGGAA-----CAGCCGGTC  
CoJapSSDRY GCAGACACGTCTGGGGTGCCTTCCATCCCG---CAGACCCACAGCCCC---CAGCACTGGGAA-----CAGCCGGTC  
AlMisS1 GCAGACACTTCTGGGGTCCCCTCCATCCCC---CAGACCCACAGCCCCA---CAGCACTGGGAA-----CAGCCAGTC  
TrScrHCC GCAGACACTACCGGAGTCCCTTCCATTCCC---CAGACCCACAGCCCCA---CAGCACTGGGAA-----CAGCCGGTC  
LeOliS GCAGACACTACCGGAGTCCCTTCCATTCCC---CAGACCCACAGCCCCG---CAGCACTGGGAA-----CAGCCTGTC  
AnPlaSSDRY GCAGACACTTCTGGGGTCCCCTCCATCCCC---CAGACCCACAGCCCCG---CAGCACTGGGAA-----CAGCCGGTC  
LaChaTFS9 GCAGACACCGCGGGGTGCCCTCTATCCCC---CAGACCCATAGCCCCA---CAACTGGGAA-----CAGCCAGTC  
XeLaeTFS1 GCAGACACAACAGGGGTTCCATCAATCCCC---CAGACACACAGCCCCA---CAACTGGGAG-----CAGCCGGTC  
BuBufTFS9 GCAGACACGACGGGAGTCCATCCATCCCC---CAGACACACAGCCCCA---CAACTGGGAG-----CAGCCTGTC  
XeSilTFS9 GCAGACACGACGGGAGTCCATCCATCCCC---CAGACACACAGCCCCA---CAACTGGGAG-----CAGCCTGTC  
BuGarS GCAGACACGACGGGGTCCCATCCATTCCC---CAGACACATAGCCCC---CAACTGGGAG-----CAACCAGTC  
RhMarS GCAGACACGACGGGGTCCCATCCATTCCC---CAGACACATAGCCCC---CAACTGGGAG-----CAACCAGTC  
GlRugSAA GCAGACACGACGGGGTCCCATCCATCCCC---CAAACCCACAGCCCC---CAACTGGGAG-----CAACCGTC  
PlWals GCTGACACAACAGGGGTTCCCTCCATTCCA---CAGACCCACAGCCCC---CAGCACTGGGAG-----CAGCCAGTC  
ScCanS1 GCTGACACCACAGGAGTCCCTTCCATCCCC---CAAACCCACAGTCCA---CAGCACTGGGAG-----CAACCCGTC  
DaRerHBTfS GCTGACTCTACAGGGGTGCCCTCCATCCCTCAATCCAACCACAGTCCG---CAGCATTGGGAC---CAGCAGCCGGTC  
MoAlbHBTf1 GCCGACACCACGGGGTGCCCTCCATCCCCCAGAAC-----AGCCCG---CAGCACTGGGAG---CAGGCTCCGGTT  
OrNilTFS9a GCCGACAACACAGGGGTGCCCTCCATCCCGCAGAAC-----AGCCCG---CAGCACTGGGAT---CCAGCGCCGGTT  
GaAcuTFS9a GCCGACACCACGGGGTCCCCTCCATCCCGCAGAGC-----AGCCCG---CAGCACTGGGAG---CAGGCTCCGGTC  
XiMacTFS9a GCCGACAACGCGGGGTGCCCTCCATCCCCAGAGG-----AGCCACAGCAGCACTGGGAG---CAGGCTCCGGTT  
TaRubTFS9b GCCGACAACACGGGTGTGCCACCATCCCGCAGAGC-----AGCCCG---CAGCACTGGGAG---CAGGCGCCAGTT  
TeNigTFS9a GCTGACAACACGGGTGTGCCACCATCCCGCAGAGC-----AGCCCG---CAGCACTGGGAG---CAGGCGCCAGTT  
OrLatSCC1 GCCGACAACGCGGGGTGCCCTCCATCCCCAGGGC-----AGCCCG---CAGCACTGGGAG---CAGGCGCCGGTC  
AsMexTFS9a ACCGATTCCGCGGGGTGCCCTTCCATTCTTTCAGCTGGCCACAGCCCC---CAGCACTGGGAC---CAGCAGCCTGTC  
GaMorS1 GCCGACACCACGGGGTGCCCTCCGTTGCCCCAGAGCAGCCACAGCCCC---CAGCACTGGGAGCACCAGACCCCGTC  
MoAlbHBTfS GCCGACACCACGGGGTGCCCTCTGTGCC---CAGACCCACAGTCCA---CAGCACTGGGAA---CAGCAGCCATT  
OdBonTfS GCTGACAGCGCTGGGGTGCCCTCTGTGCC---CAGACCCACAGTCCA---CAGCACTGGGAG---CAGCAGCCCATC  
PoRetS GCCGACAGCACCAGGGGTGCCCTCTGTGCC---CAGACCCACAGTCCA---CAGCACTGGGAG---CAGCAGCCTGTG  
XiMacTFS9b GCCGACAGCACTGGGGTGCCCTCTGTGCC---CAGACCCACAGTCCA---CAGCACTGGGAG---CAGCAGCCGATT  
EpCois2 GCTGACACCACGGGGTGCCCTCTGTGCC---CAGACCCACAGTCCG---CAGCACTGGGAG---CAGCAGCCATT  
TaRubTFS9a GCCGACAACGCGGGTCCCCTCCGTTCCC---CAGACCCACAGTCCG---CAACTGGGAG---CAGCAGCCATT  
TeNigTFS9b GCCGACAATGCCGGGTCTCCTCCGTTCCC---CAGACCCACAGTCCG---CAGCACTGGGAG---CAGCAGCCATT  
OrNilTFS9b GCTGACACCACGGGGTGCCCTCTGTGCC---CAGACCCACAGTCCG---CAGCACTGGGAG---CAGCCATT  
CiMonTFS9 GCTGACACCACGGGGTGCCCTCTGTGCC---CAGACCCACAGTCCG---CAGCACTGGGAT-----CAGCCATT  
CySemSHB GCTGACACCACGGGGTGCCCTCCGTTGCC---CAGACCCACAGCCCT---CAGCACTGGGAT---CAGCAGCCATT  
OrLatSCC GCTGACAGTACTGGGGTGCCATCTGTGCCA---CAGACCCACAGTCCA---CAGCACTGGGAG---CAGCAGCCATA  
GaAcuTFS9b GCCGACACCACGGGGTGCCCTCCGTTGCC---CAGACCCACAGTCCG---CAGCACTGGGAG---CAGCAGCCCATC  
SaSalTFS2 GCCGACCCACCGGAGTGCCCTCCGTTGCCA---CAGACCCACAGTCCA---CAGCACTGGGAG---CAGCAGCCTGTC  
GaMorS2 GCCGACCCACCGGAGTGCCCAGCGTGCC---CAGACCCACAGTCCG---CAGCACTGGGAG---CAGCAGCCGTC  
AsMexTFS9b GCCGACACCACGGGGTACCCTCCGTTGCC---CAGACCCACAGTCCC---CAACTGGGAG---CAGCAACCCGTC  
ClGarS ACTGATACCAGTGGTGTTCGAATGTGCCT---CAGACCCACAGTCCC---CAG---TGGGAG---CAGCAGCCAGTC  
CyCarHTf13 GCCGACACG-----CTGCCG---CAGGCGCACAGTCCG---CAGCACTGGGAG---CAGCAGCCGTC  
ClGarS1 ACCGAGACCCAG-----TCAGGCCACAGCCCC---CAGCACTGGGAC---CAGCAGCCGGTC  
DaRerHBTf1 GCGGCGCGGAT-----ACTGCACACACA-----CACCCTGGGAC---CCGACCCGTC

2029

HoSapSSDR3 TACACACAGCTCACTCGACCT  
MuMusSCG1 TACACACAGCTCACCAGACCC  
CaLupS1 TACACACAGCTCACCAGGCCT  
GaGalSTF2 TACACGCAGCTCACCCGGCCT  
CoJapSSDRY TACACGCAGCTCACCCGGCCT  
AlMisS1 TACACACAGCTCACTAGGCCA  
TrScrHCC TACACACAGCTTACTAGGCCA  
LeOliS TACACACAGCTCACTAGGCCA  
AnPlaSSDRY TACACACAGCTCACCAGACCC  
LaChaTFS9 TATACACAACCTCACCAGGCCT  
XeLaeTFS1 TACACACAGCTCACAAGACCC  
BuBufTFS9 TATACACAGCTCACCAGGCC  
XeSilTFS9 TATACACAGCTCACCAGGCC  
BuGarS TACACACAGCTCACCAGGCCA  
RhMarS TACACACAGCTCACCAGGCCA

|            |                        |
|------------|------------------------|
| GlRugSAA   | TACACACAGCTGACCAGGCCA  |
| PlWals     | TATACACAGCTCACCCGGCCT  |
| ScCanS1    | TACACCACCCTGACCCGACCT  |
| DaRerHBTFS | TACACGCAGCTGTCCAGACCA  |
| MoAlbHBTf1 | TACACCCAGCTCACCAGACCC  |
| OrNilTFS9a | TACACCCAGCTCACCAGACCC  |
| GaAcuTFS9a | TACACCCAACTCCCCAGGCC   |
| XiMacTFS9a | TACACCCAGCTAACCCGACCC  |
| TaRubTFS9b | TACACCCAGCTCACCAGACCC  |
| TeNigTFS9a | TACACCCAGCTCACCAGACCC  |
| OrLatSCC1  | TACACGCAGCTGACCCGGCCC  |
| AsMexTFS9a | TACACACAGCTGACGAGACCC  |
| GaMorS1    | TACACCCAGCTCACCAGGCC   |
| MoAlbHBTFS | TACACACAGCTGTCCAGGCCA  |
| OdBonTFS   | TACACACAACCTGTCCAGGCC  |
| PoRetS     | TATACCCAGCTGACCCGGCCC  |
| XiMacTFS9b | TACACACAACCTGTCCAGGCC  |
| EpCois2    | TACACACAGCTCTCCAGGCCA  |
| TaRubTFS9a | TACACGCAGCTCTCCAGGCCA  |
| TeNigTFS9b | TACACGCAGCTCTCCAGGCCA  |
| OrNilTFS9b | TACACACAACCTTTCCAGGCC  |
| CiMonTFS9  | TACACACAACCTCTCCAGGCC  |
| CySemSHB   | TACACACAACCTGTCCAGACCG |
| OrLatSCC   | TACACCCAGCTGTCCAGACCG  |
| GaAcuTFS9b | TACACACAGCTCTCCAGGCCT  |
| SaSaltFS2  | TACACCCAGCTCTCCAGGCC   |
| GaMorS2    | TACACGCAGCTGTCCCGGCC   |
| AsMexTFS9b | TACACCCAGTTGTCTCGACCT  |
| ClGarS     | TATACCCAGCTCTCCCGGCCT  |
| CyCarHTF13 | TACACCCAGCTGTCCAGGCC   |
| ClGarS1    | TACACACAGCTCTCCGGACCC  |
| DaRerHBTf1 | TACACACAGCTGTCCAGACCC  |
